# Supplementary material for: Assessing Inequities in COVID-19 Vaccine Roll-Out Strategy Programs: A Cross-Country Study Using a Machine Learning Approach
Source: MDPI journal article supplement (doi:10.3390/vaccines10020194), 2022-01-26
Supplement: s1 [file s1]

**Figure S1.** scatterplots showing the relationships between the Vaccine Roll-Out Index (VRI) and the covariates under study.

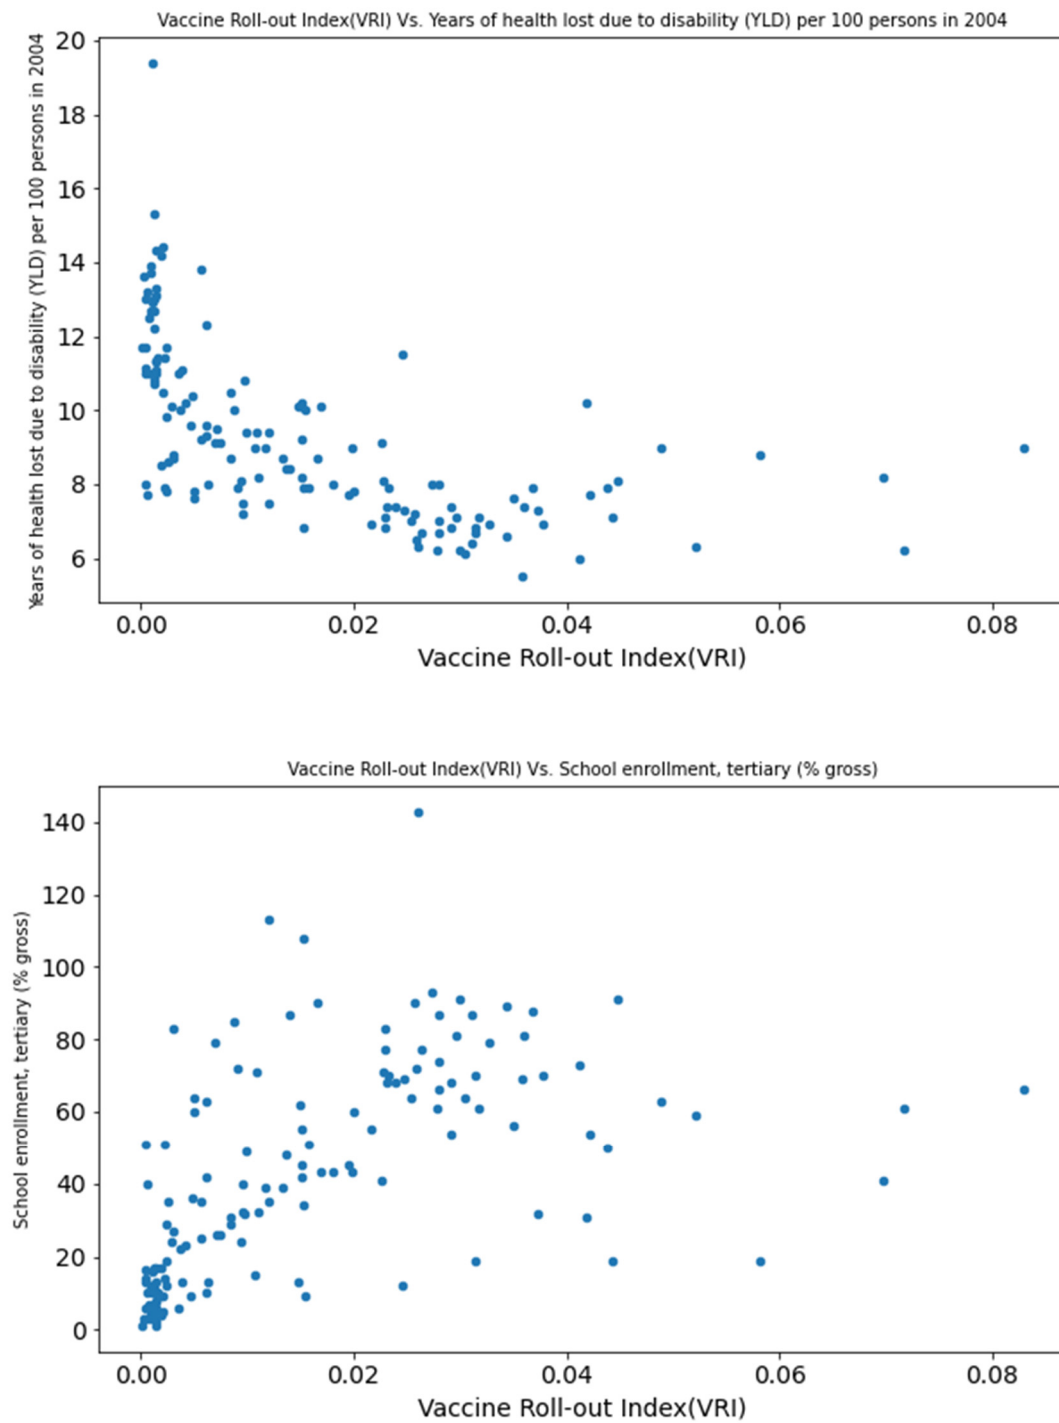

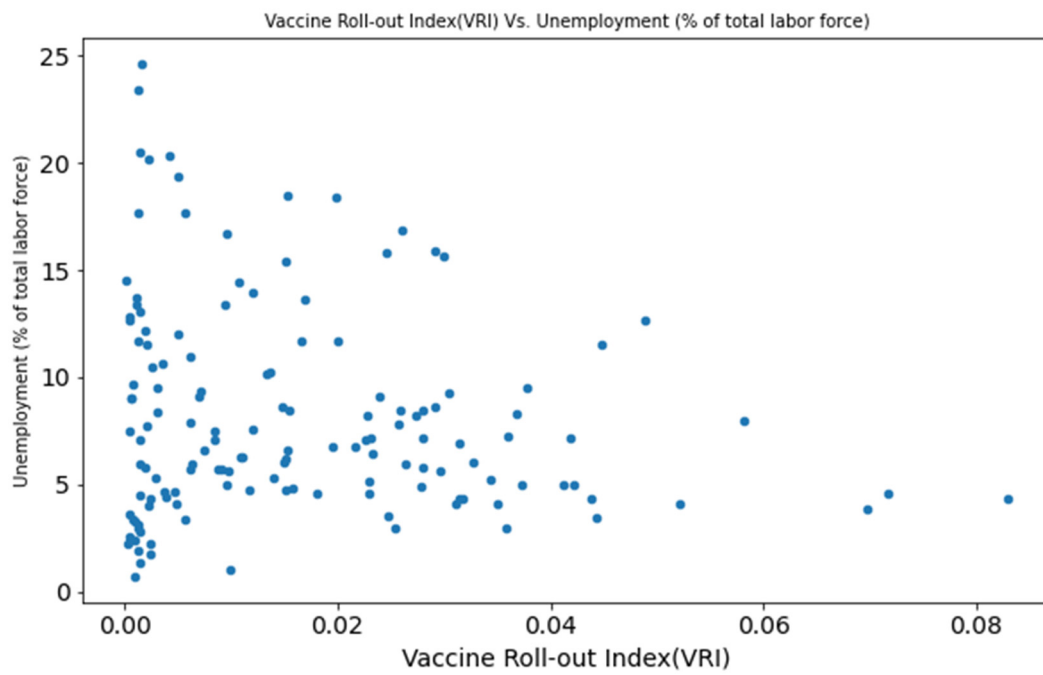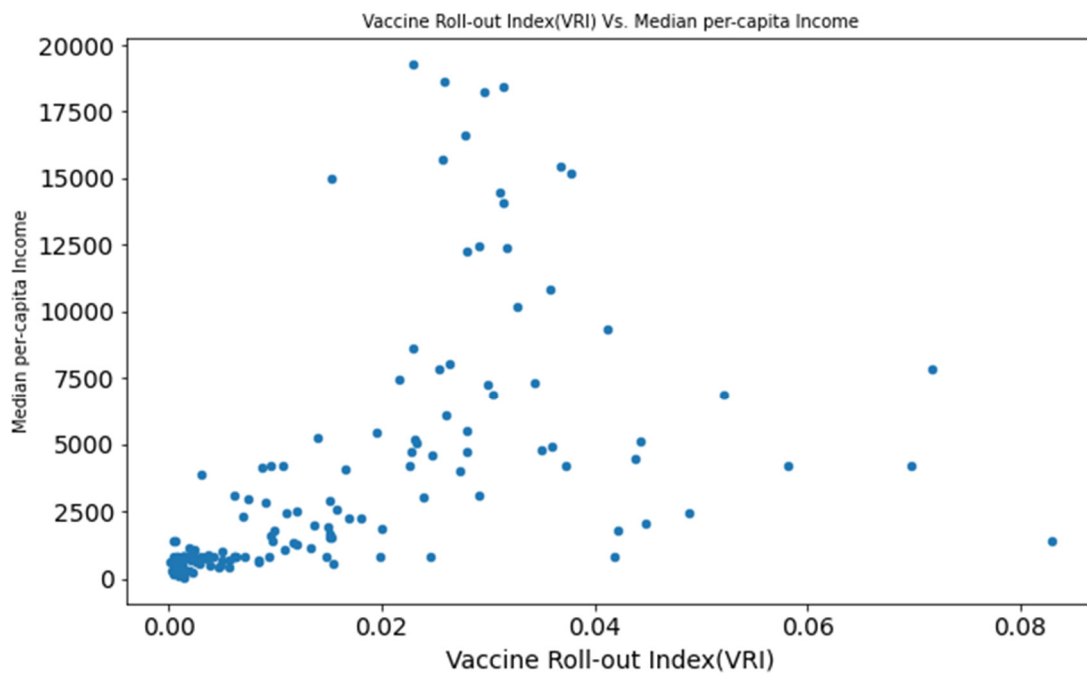

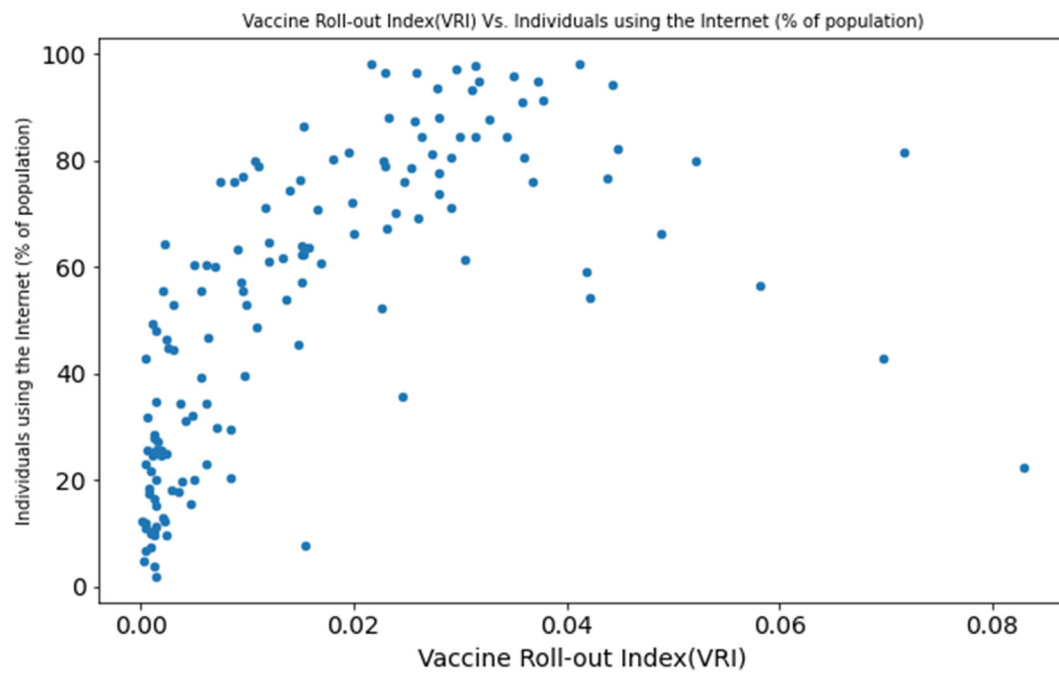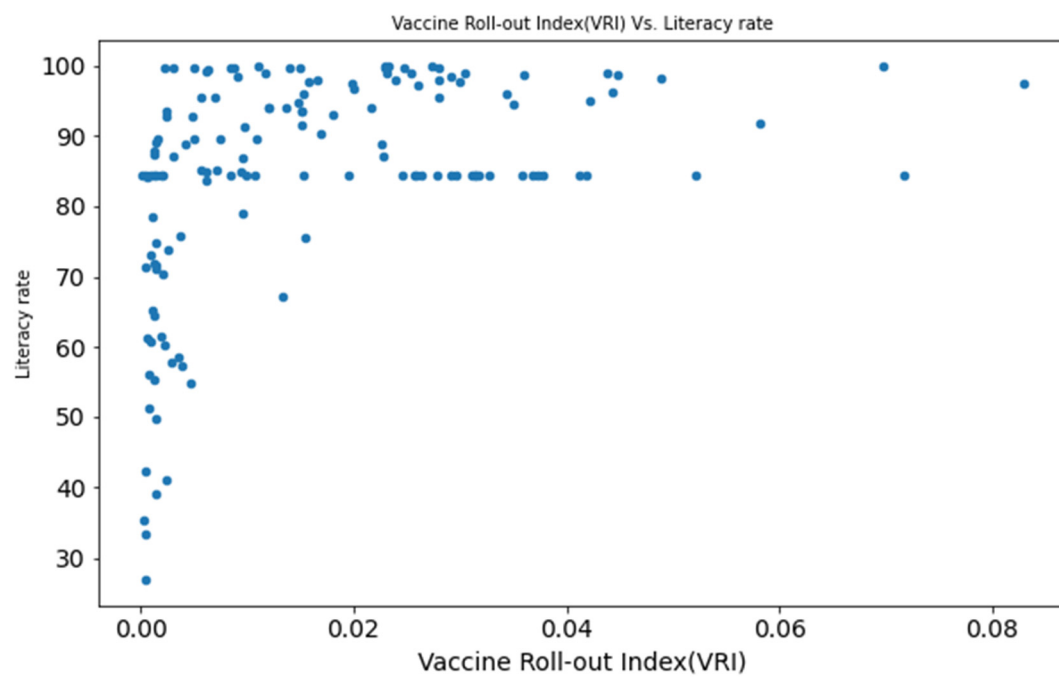

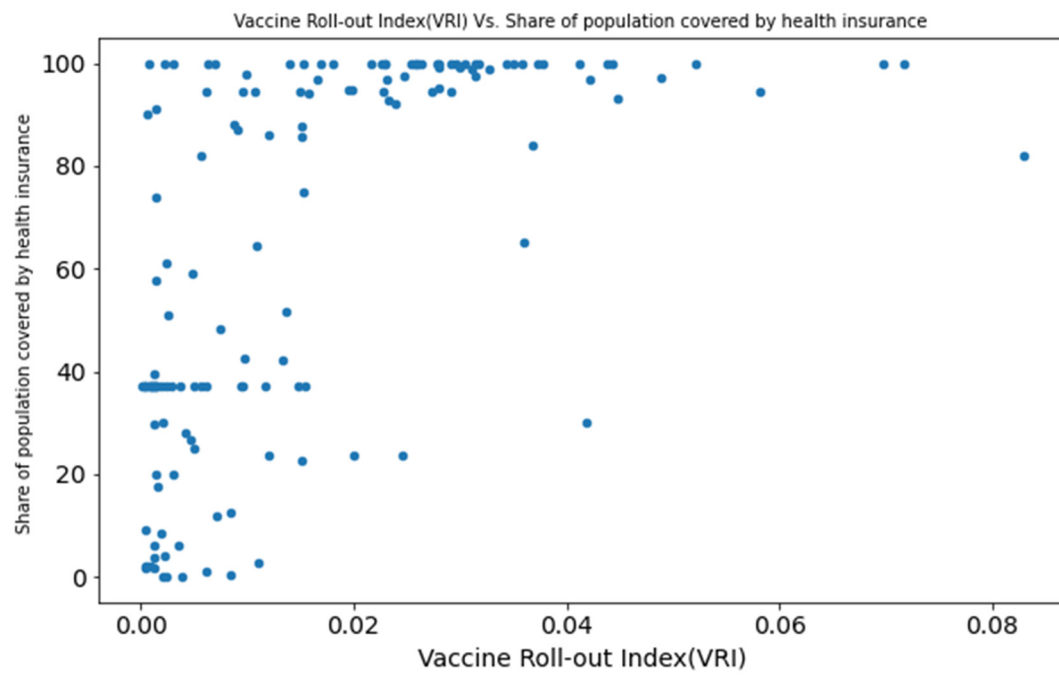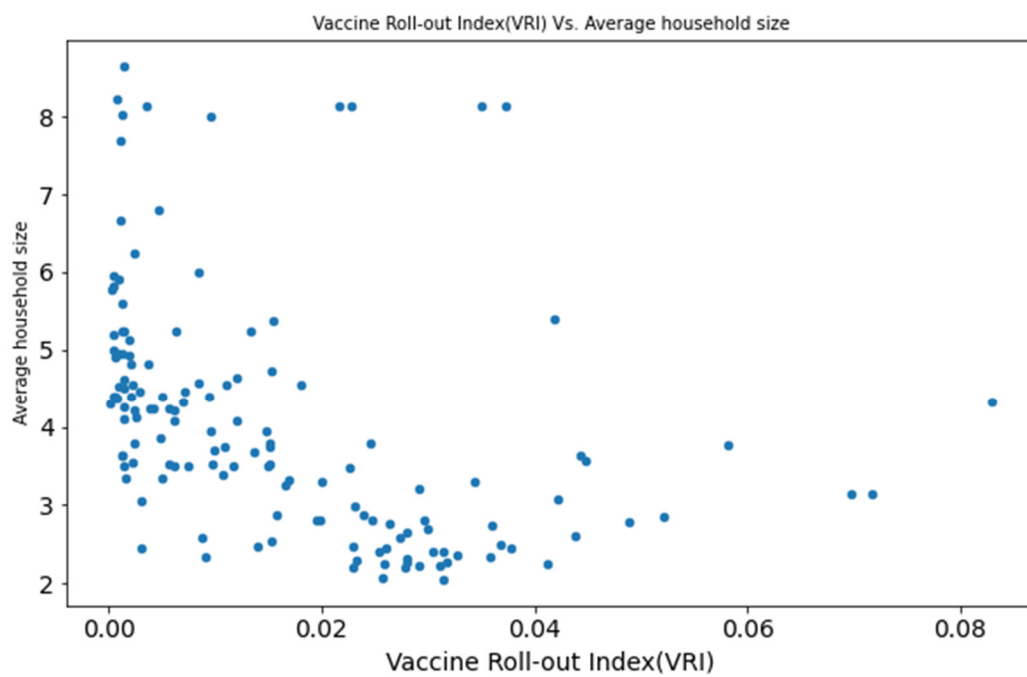

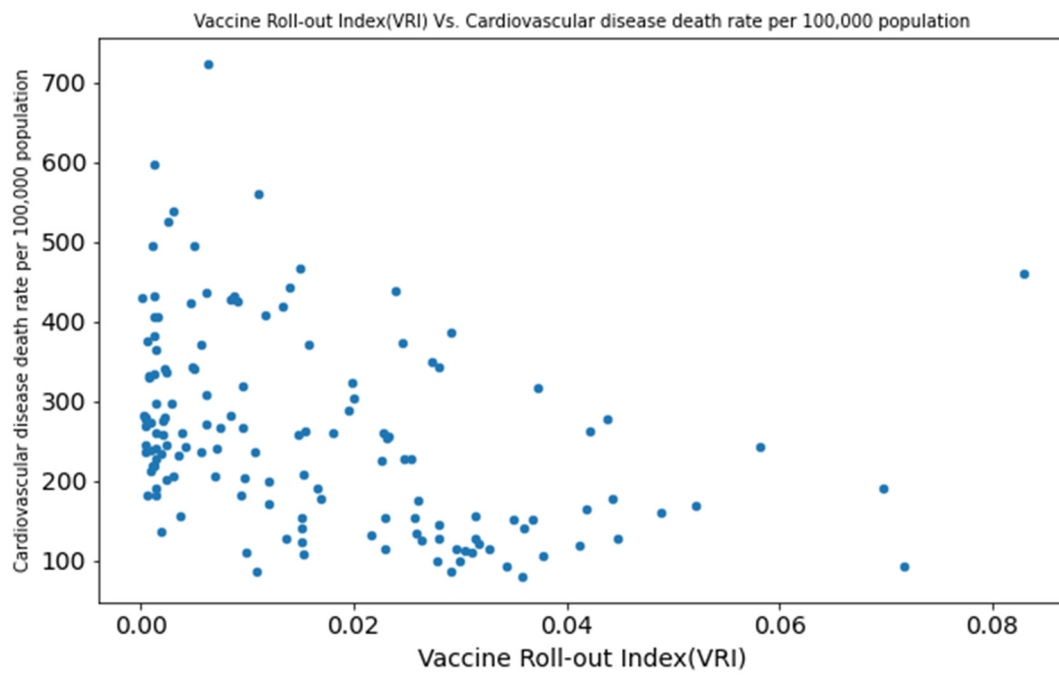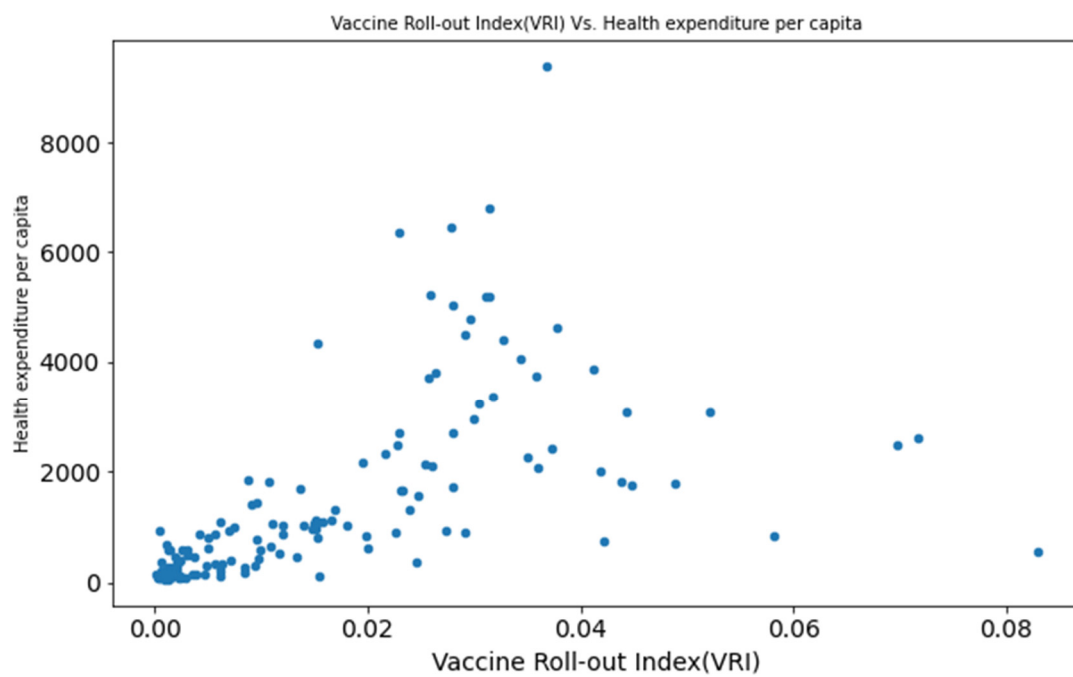

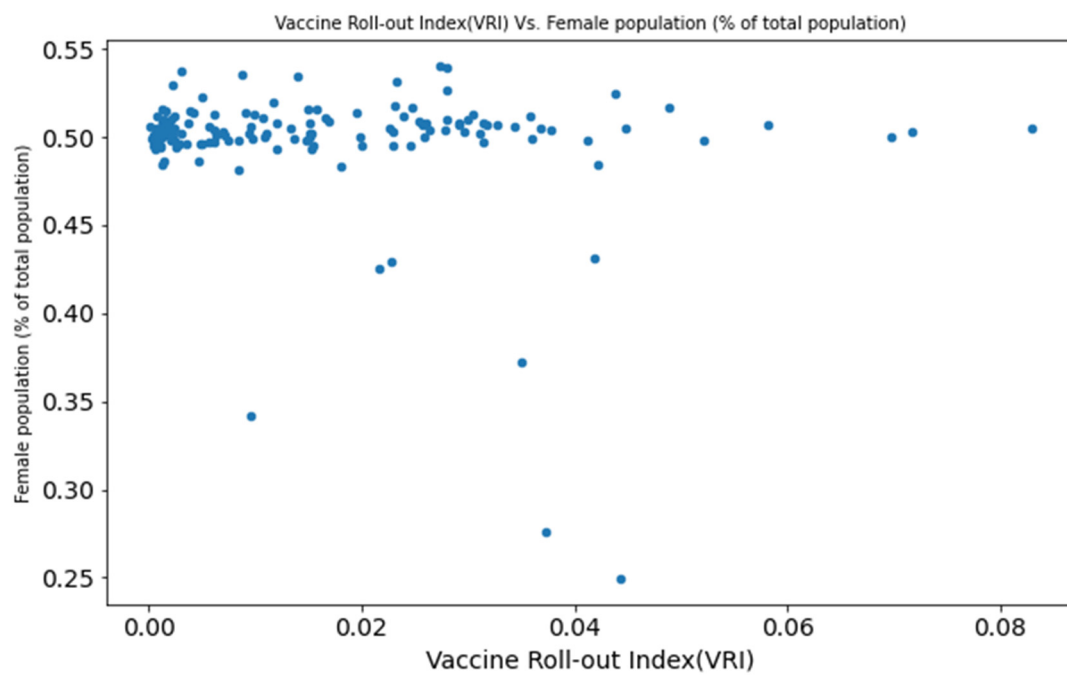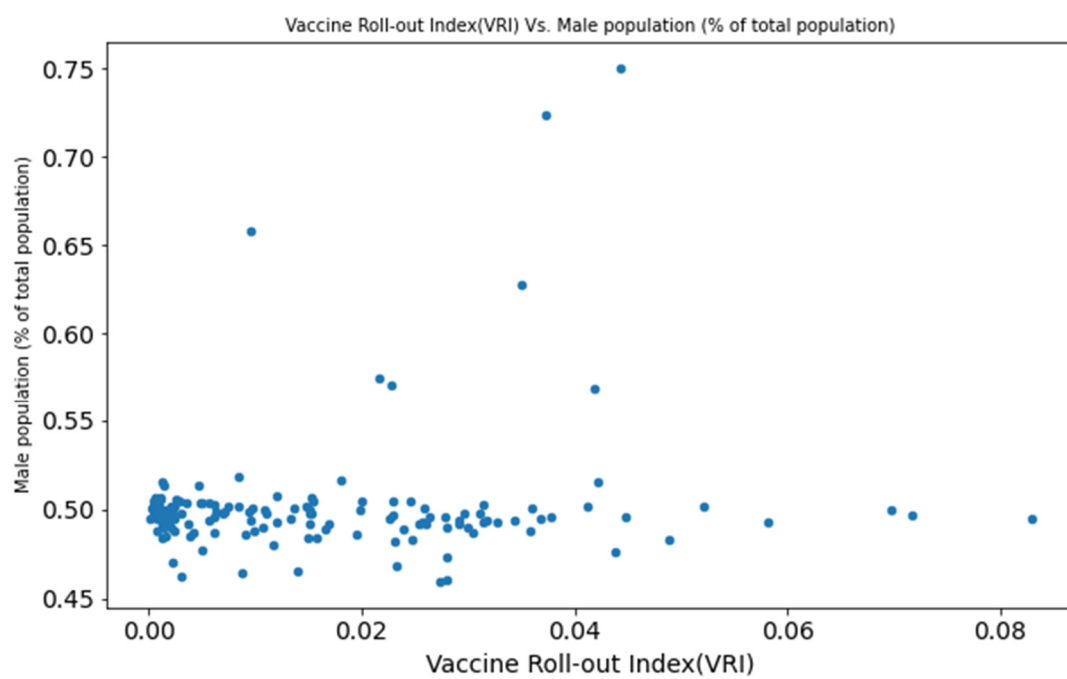

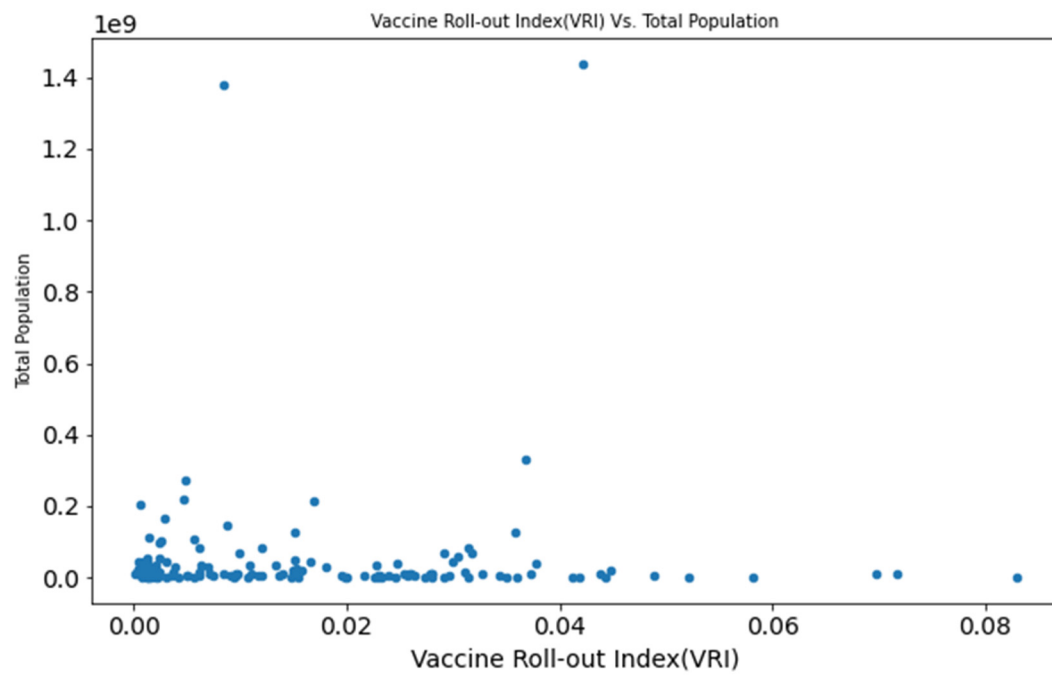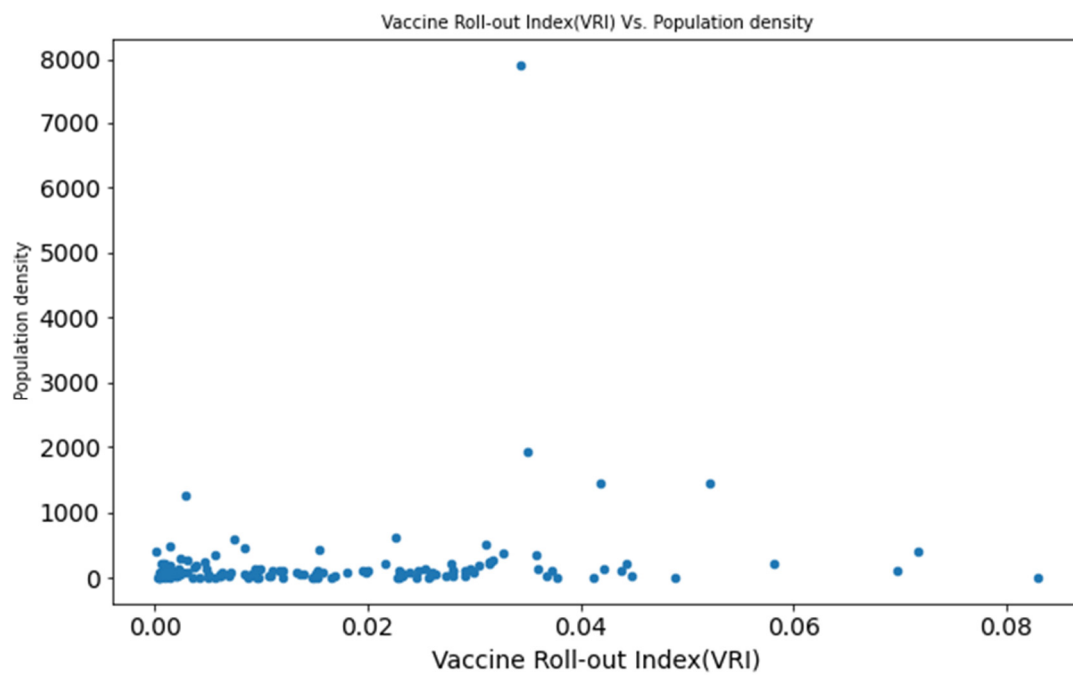

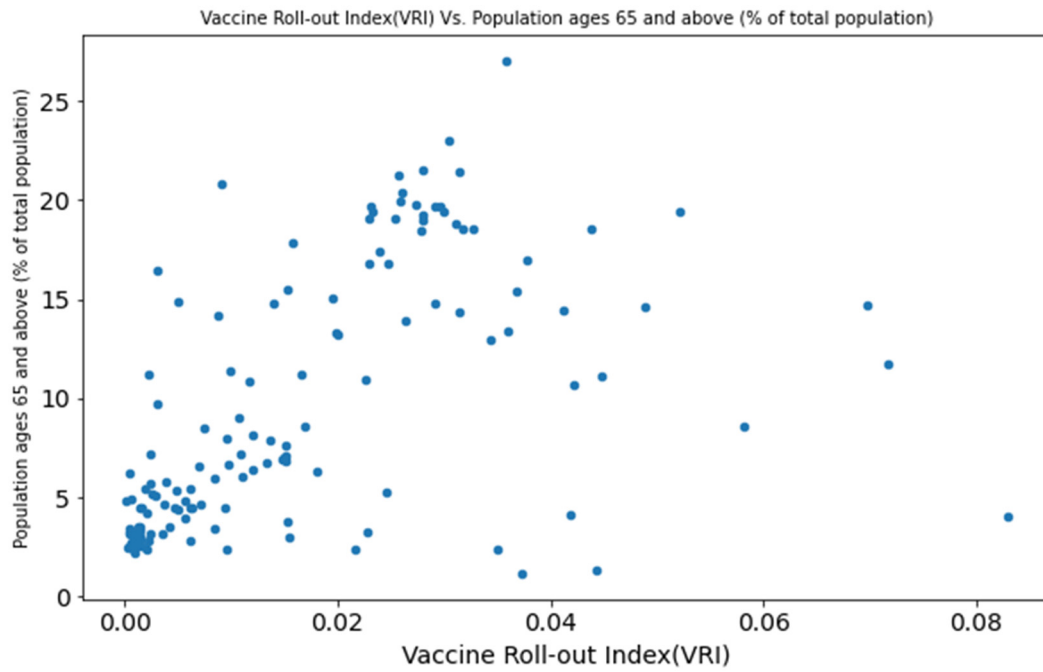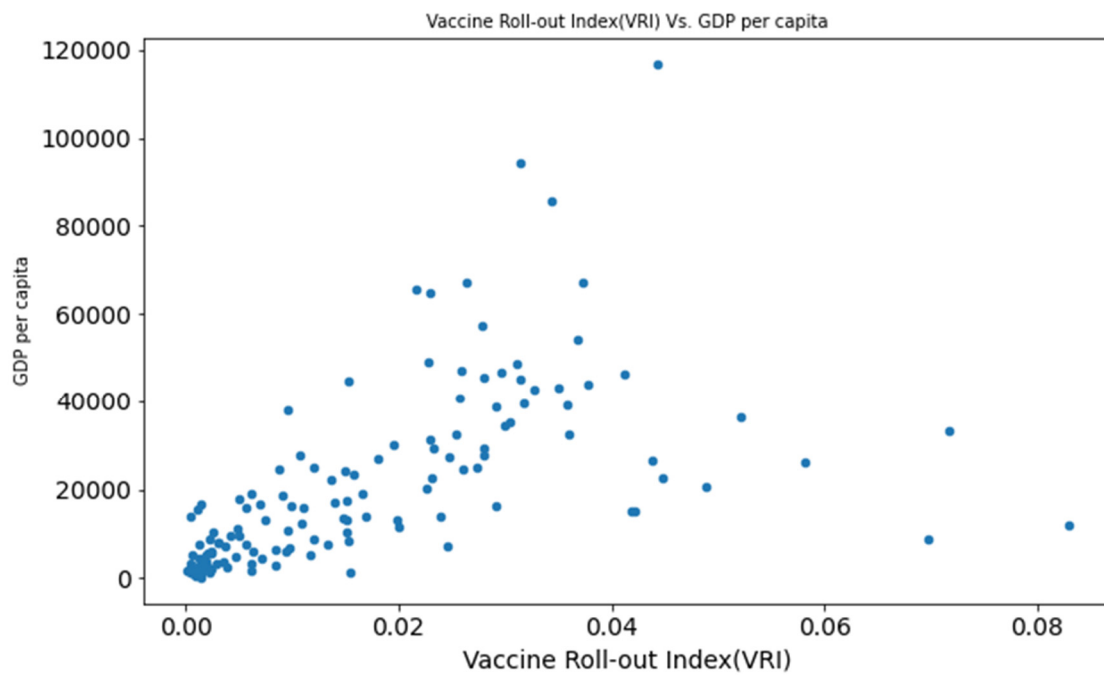



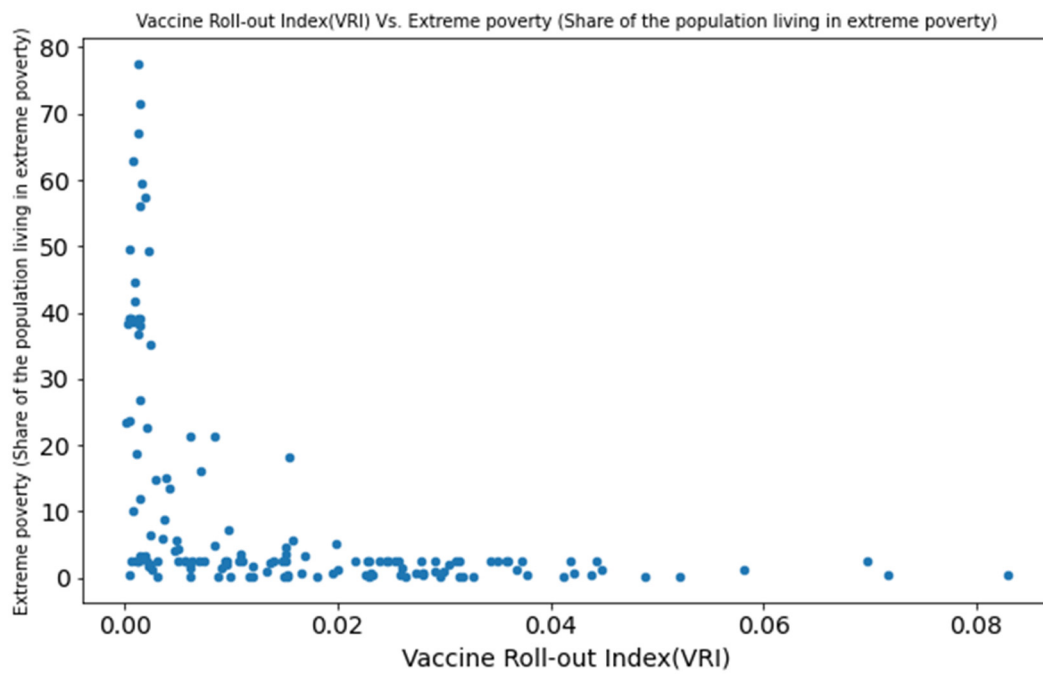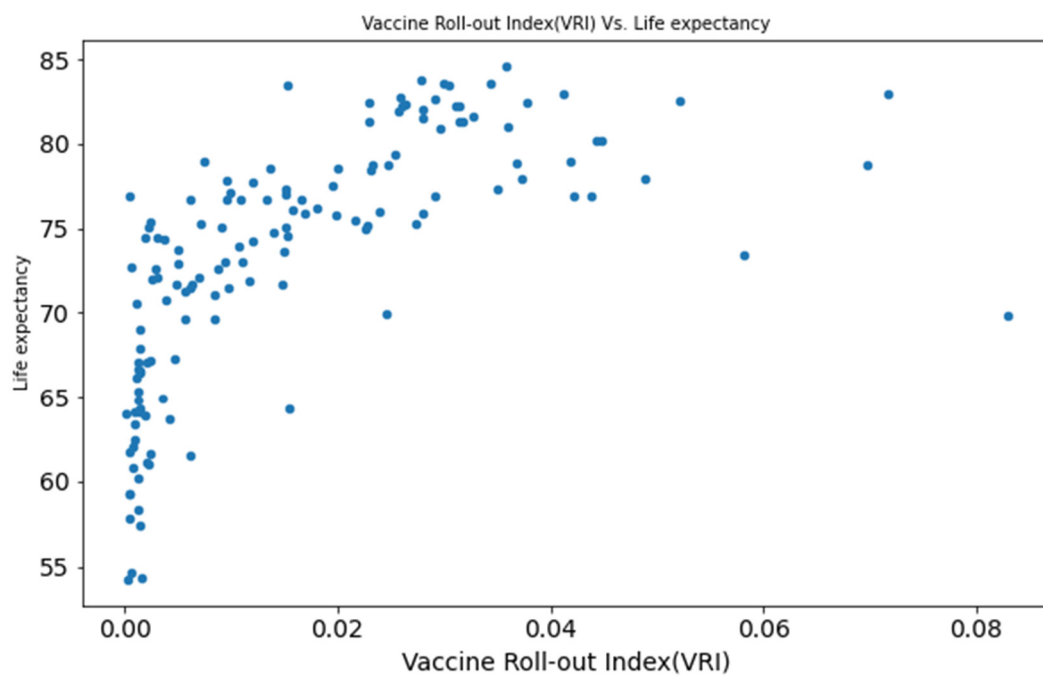

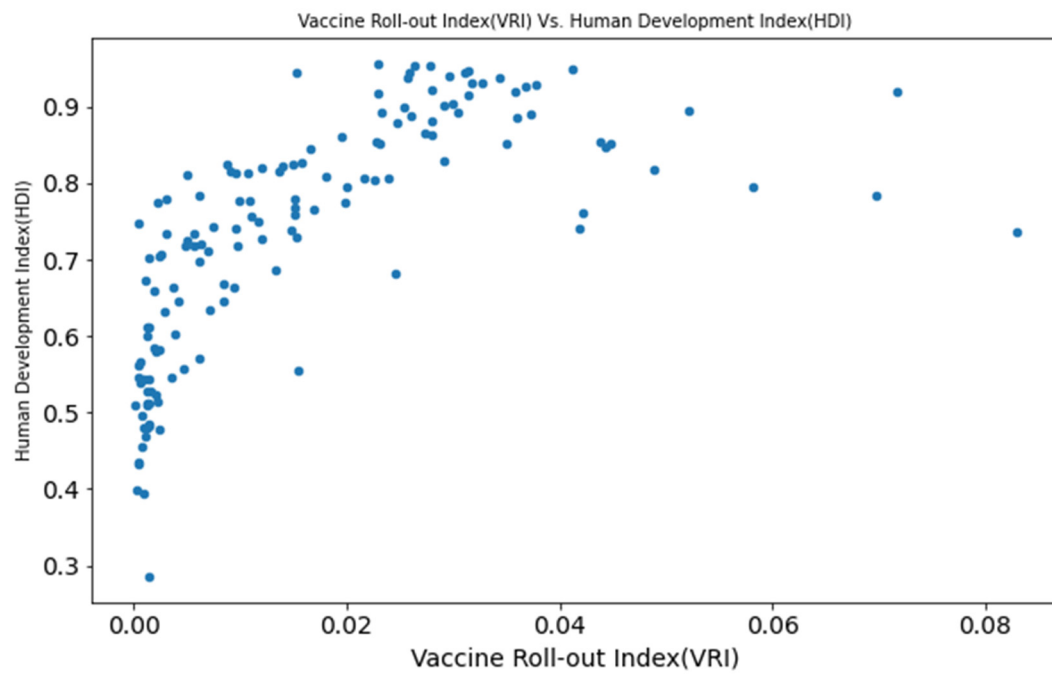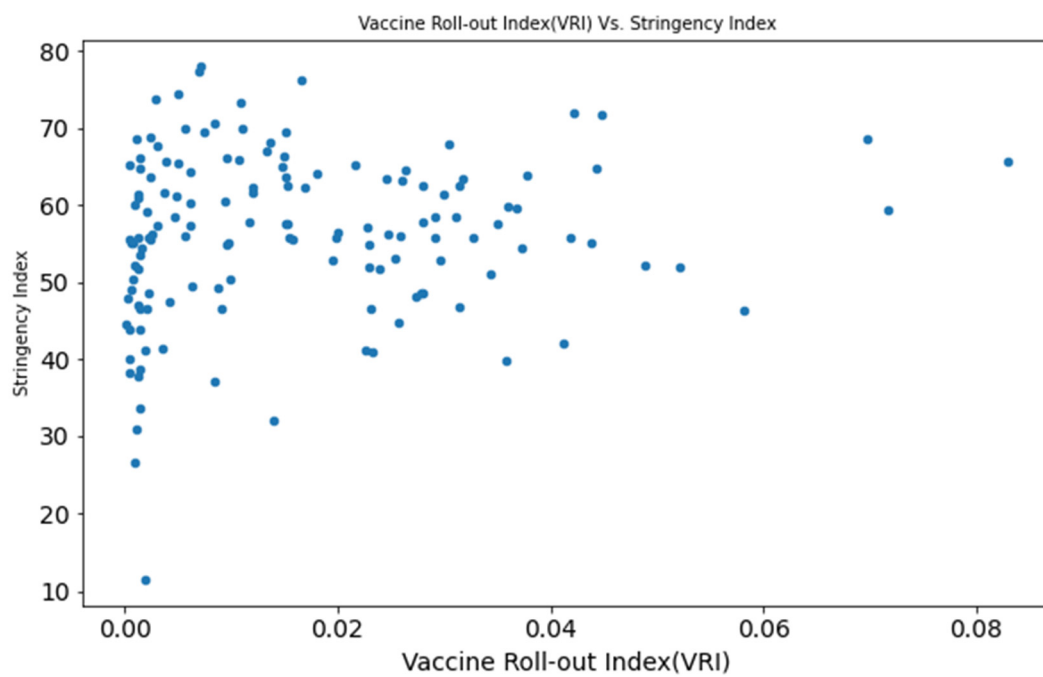

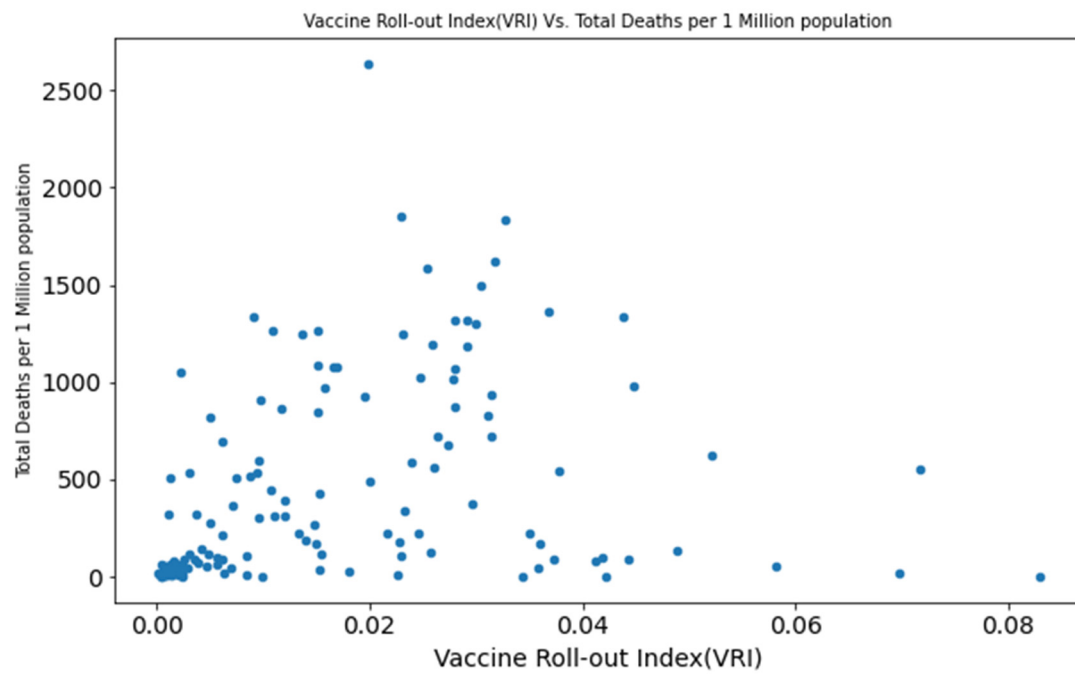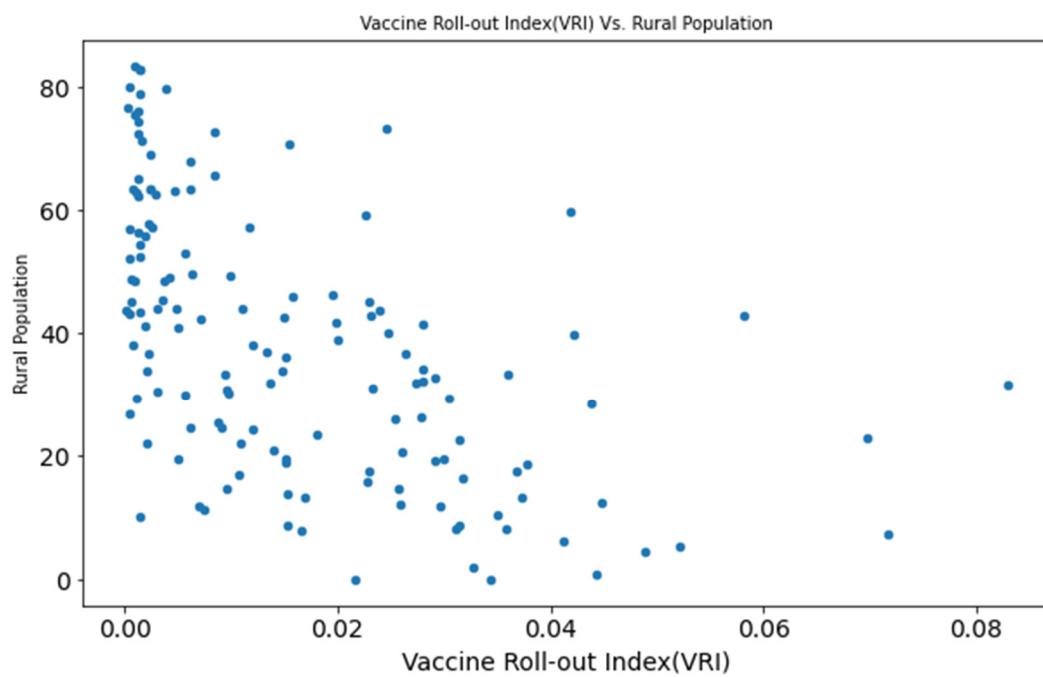

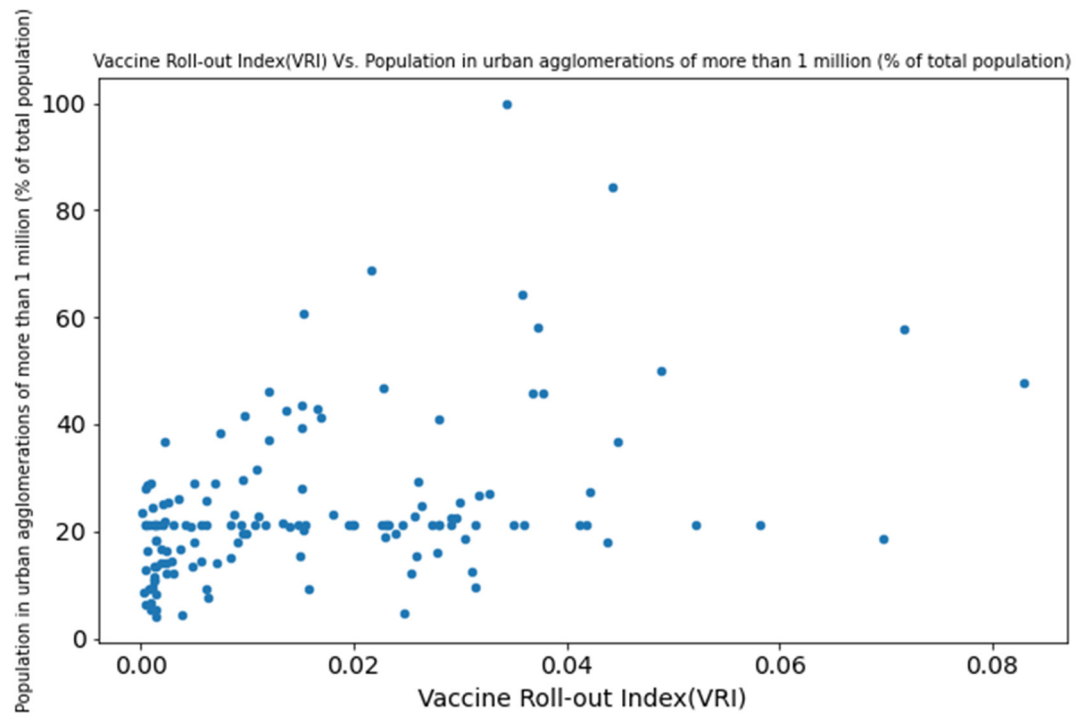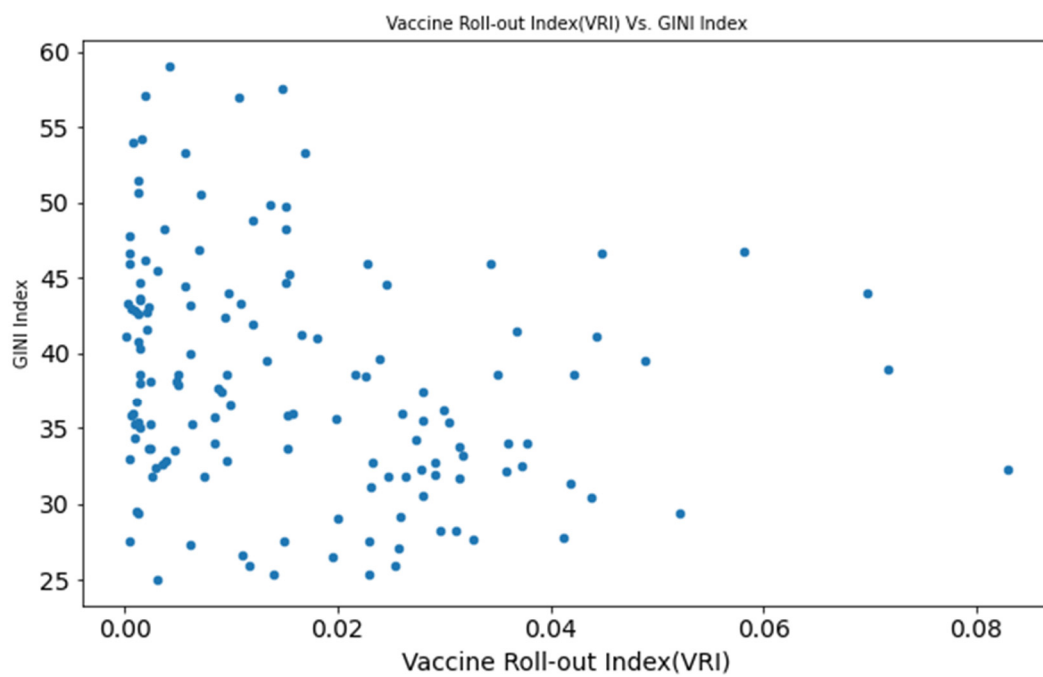

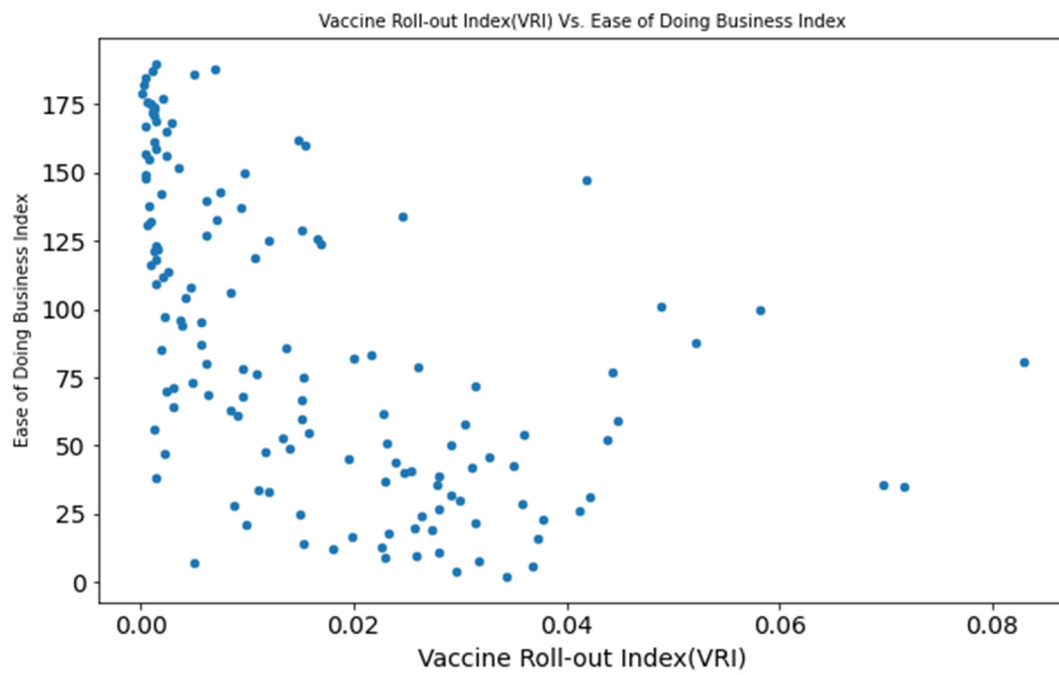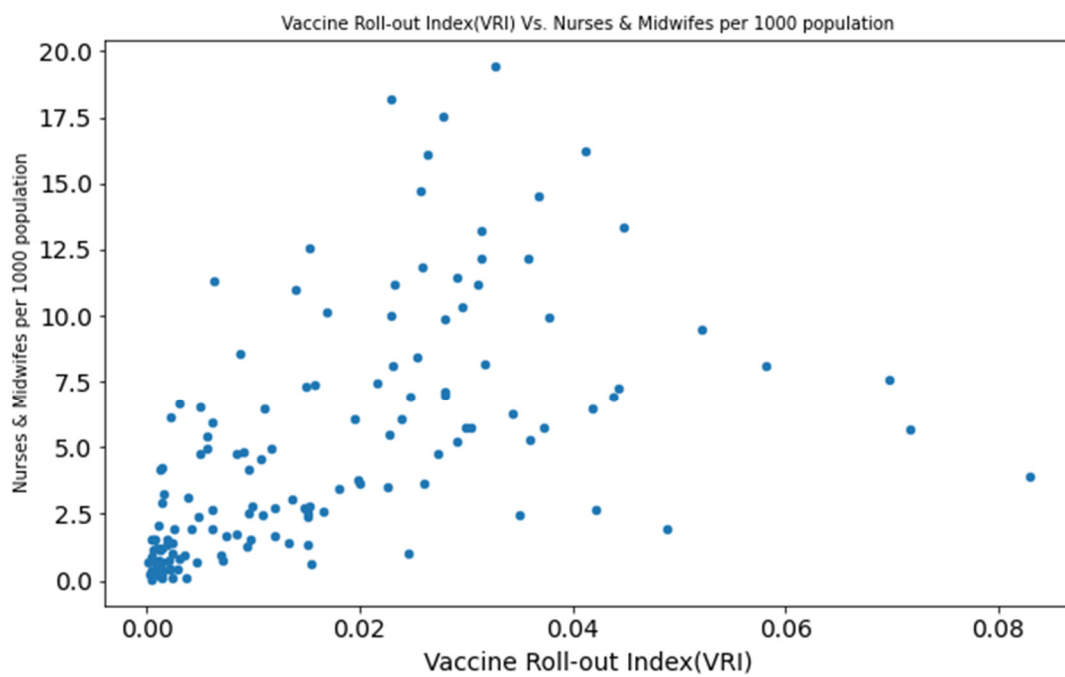

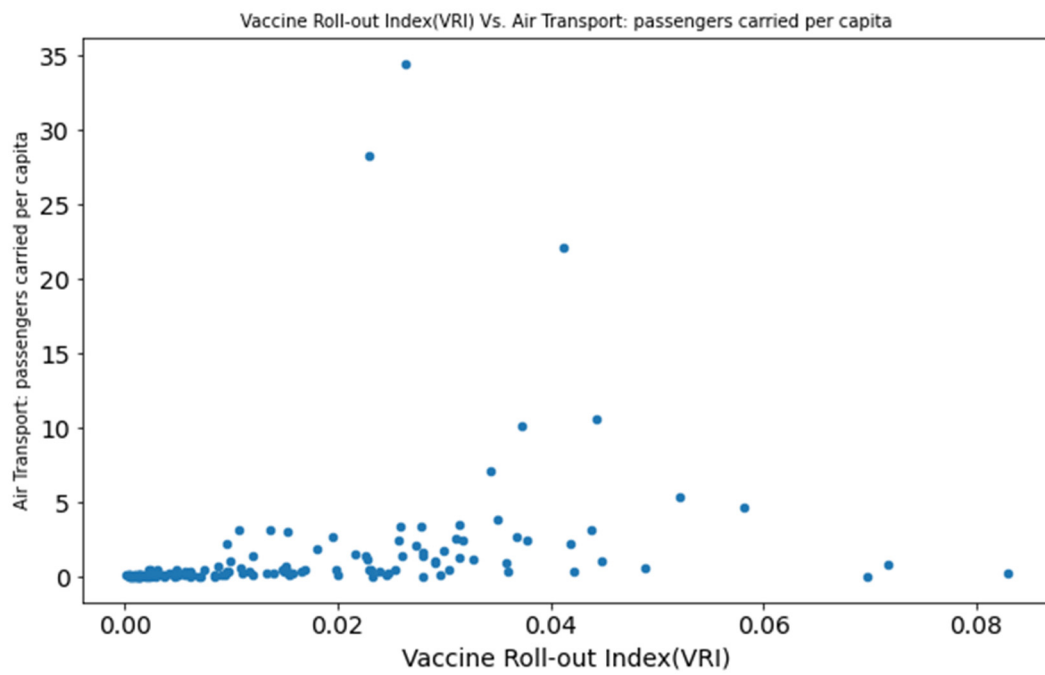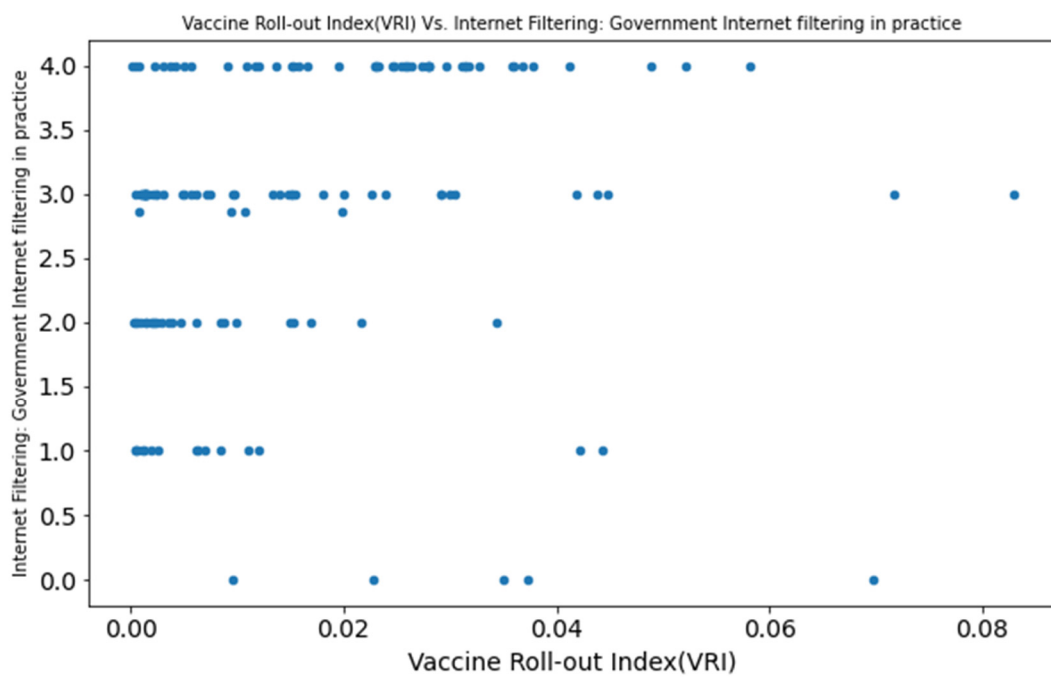

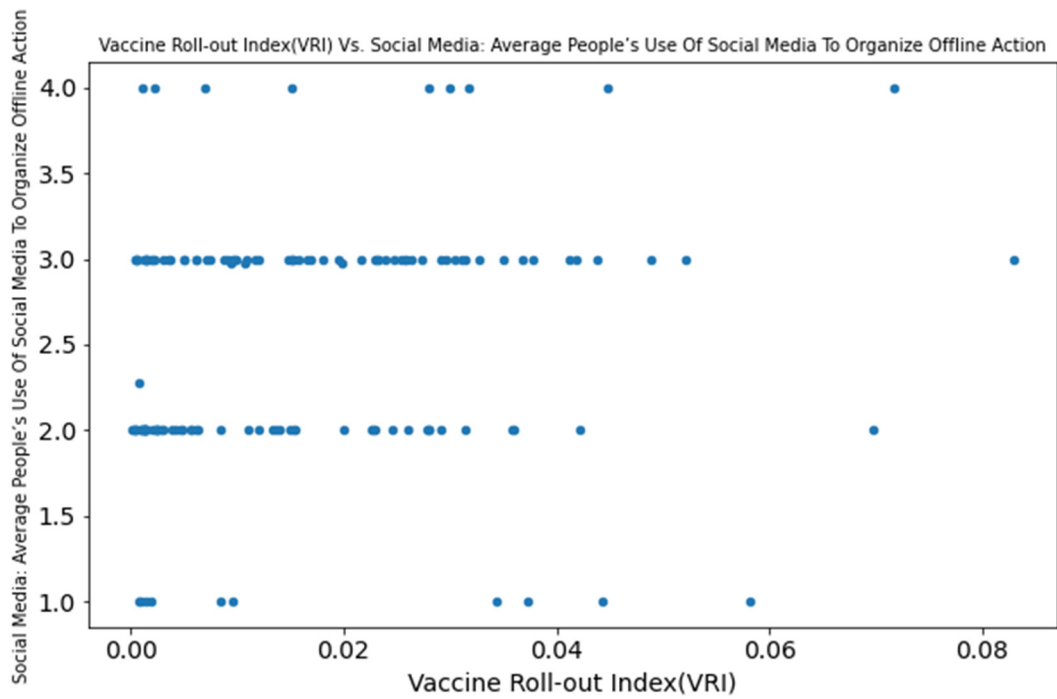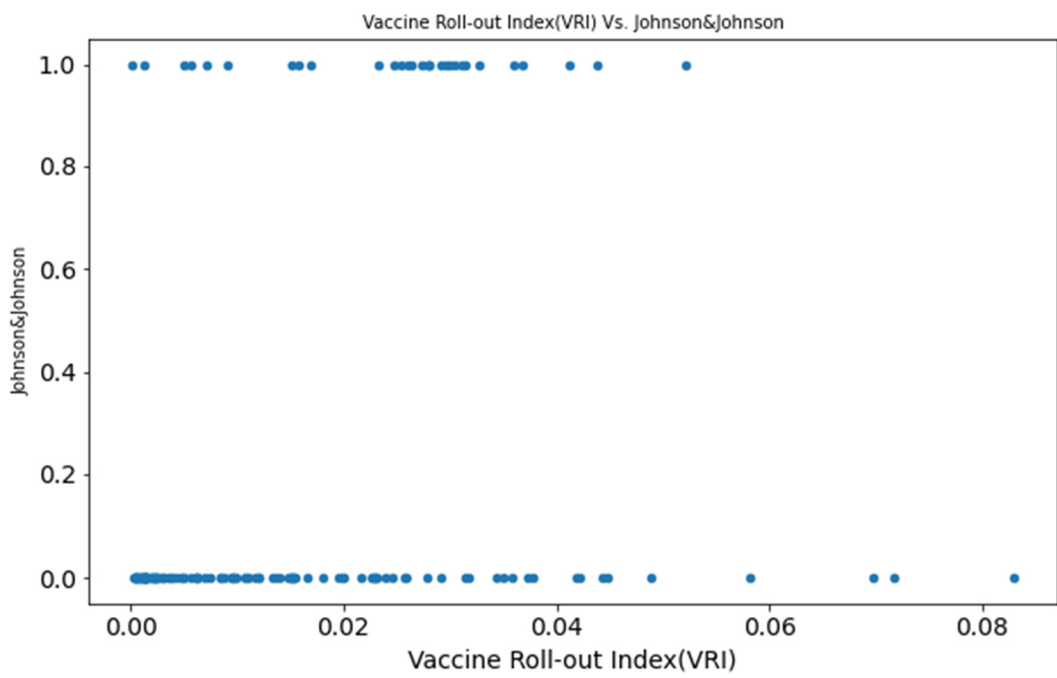

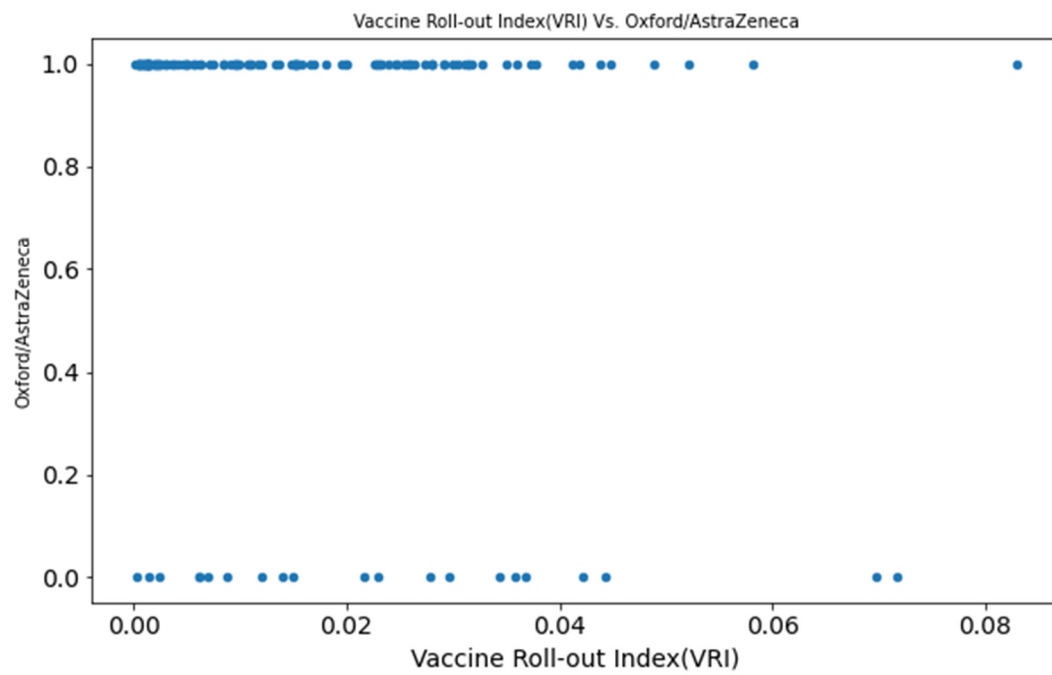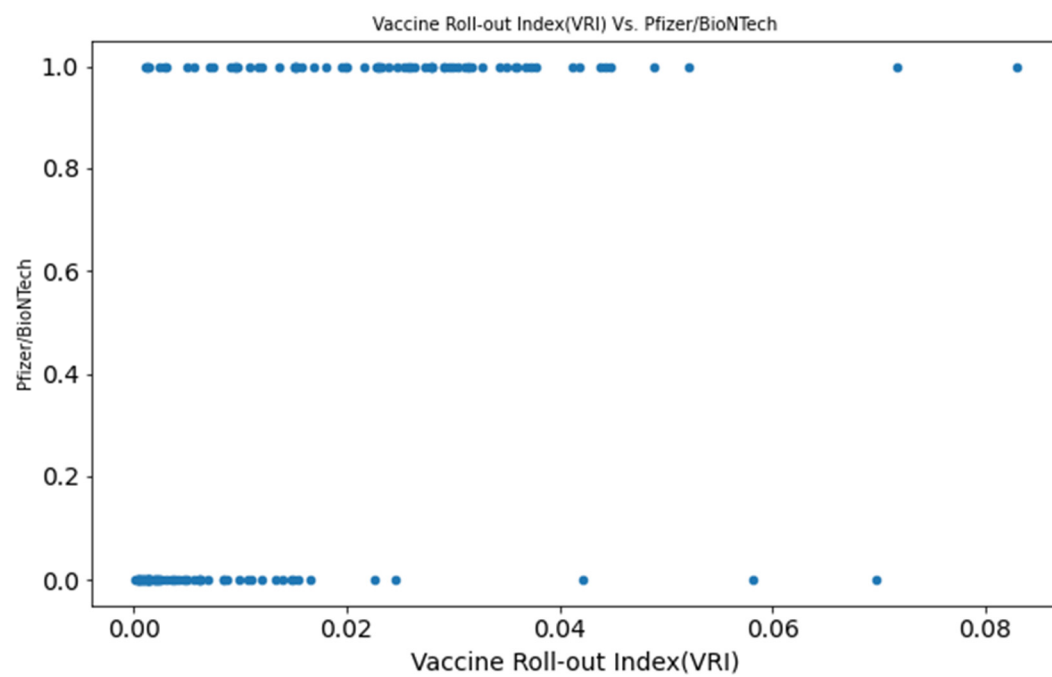



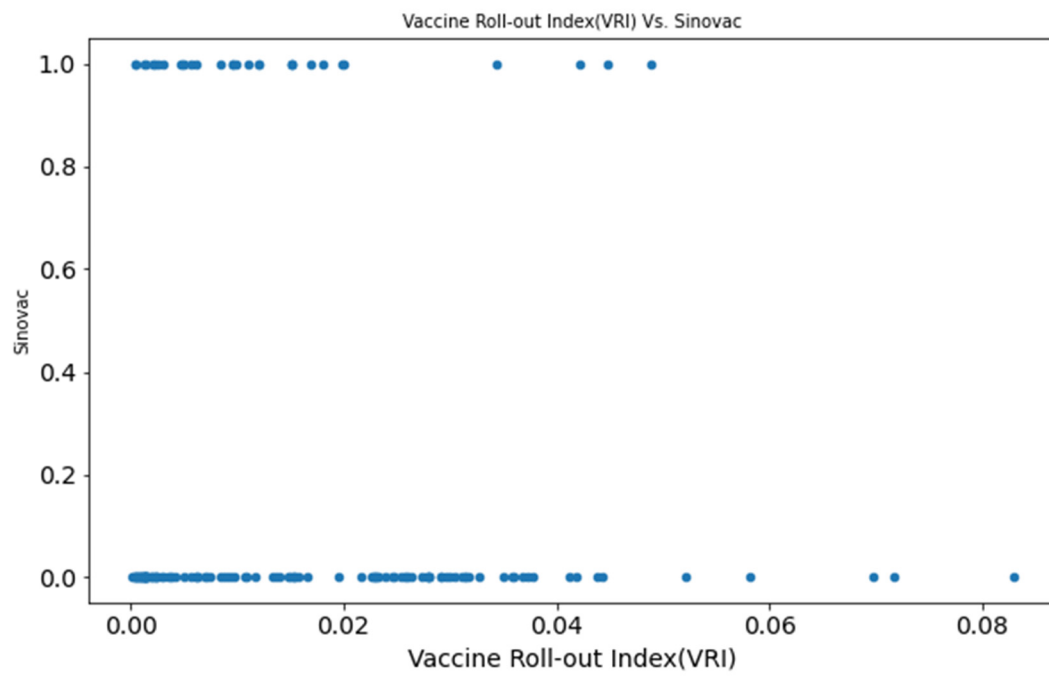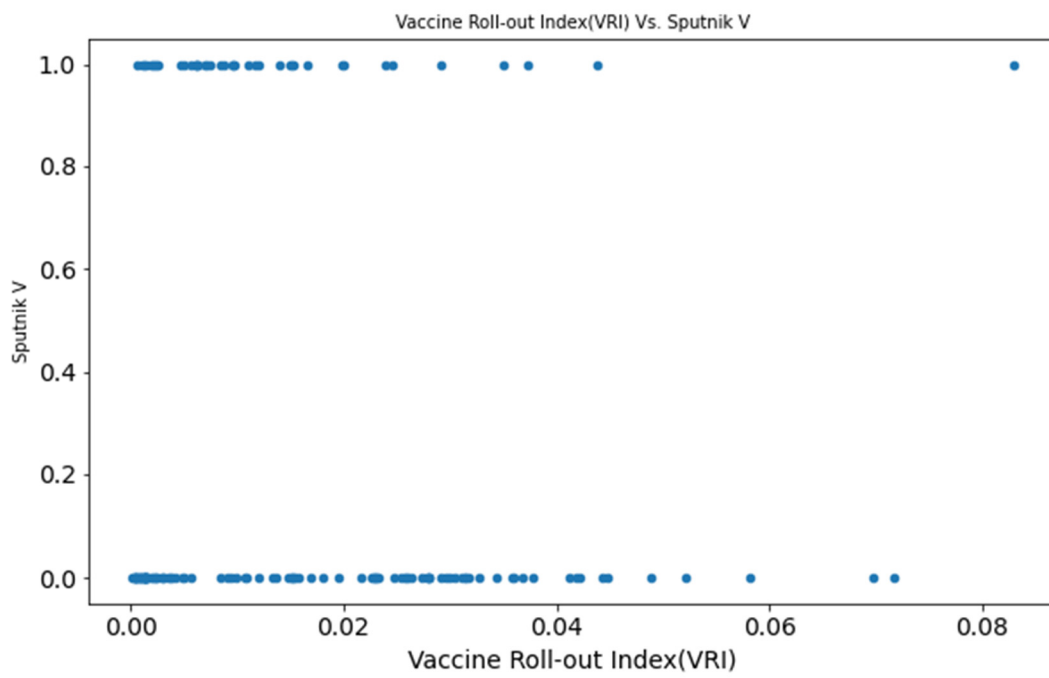

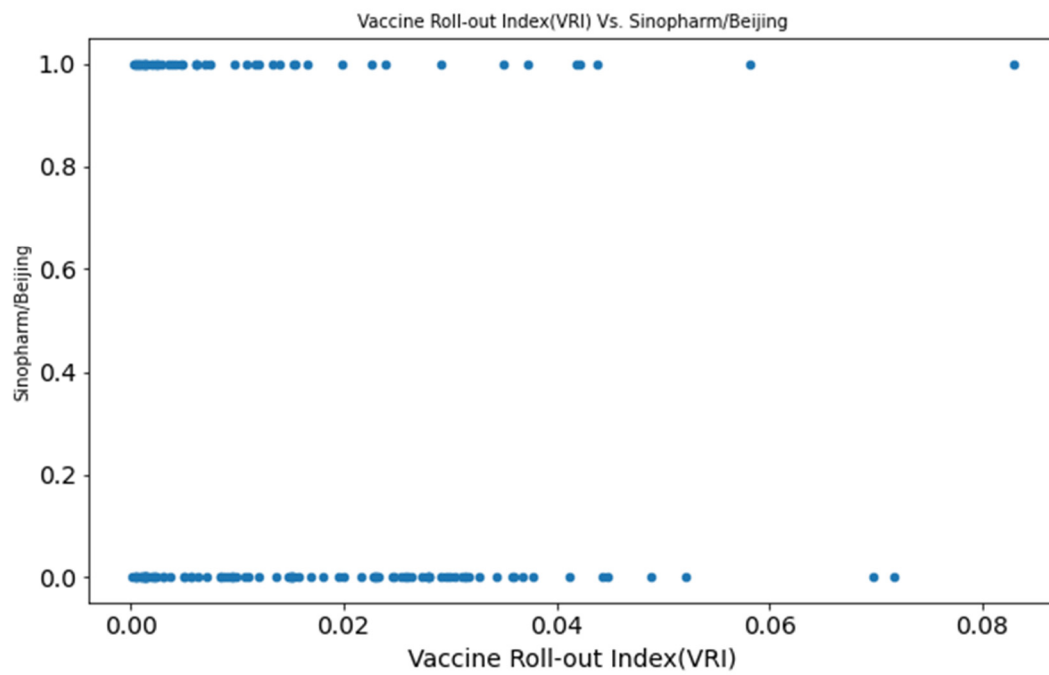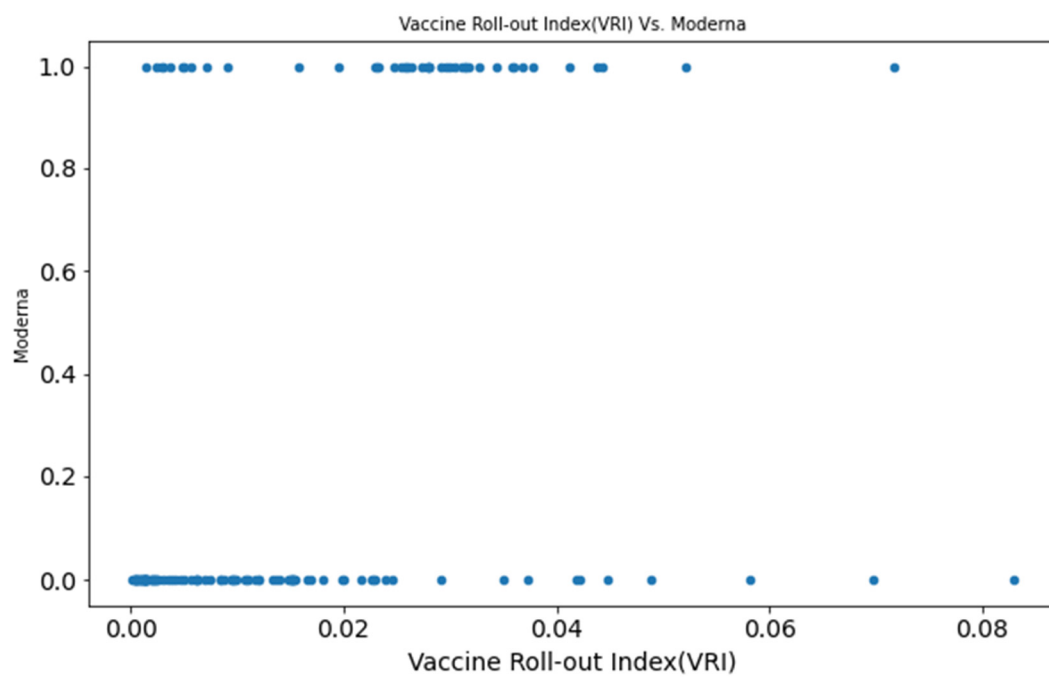

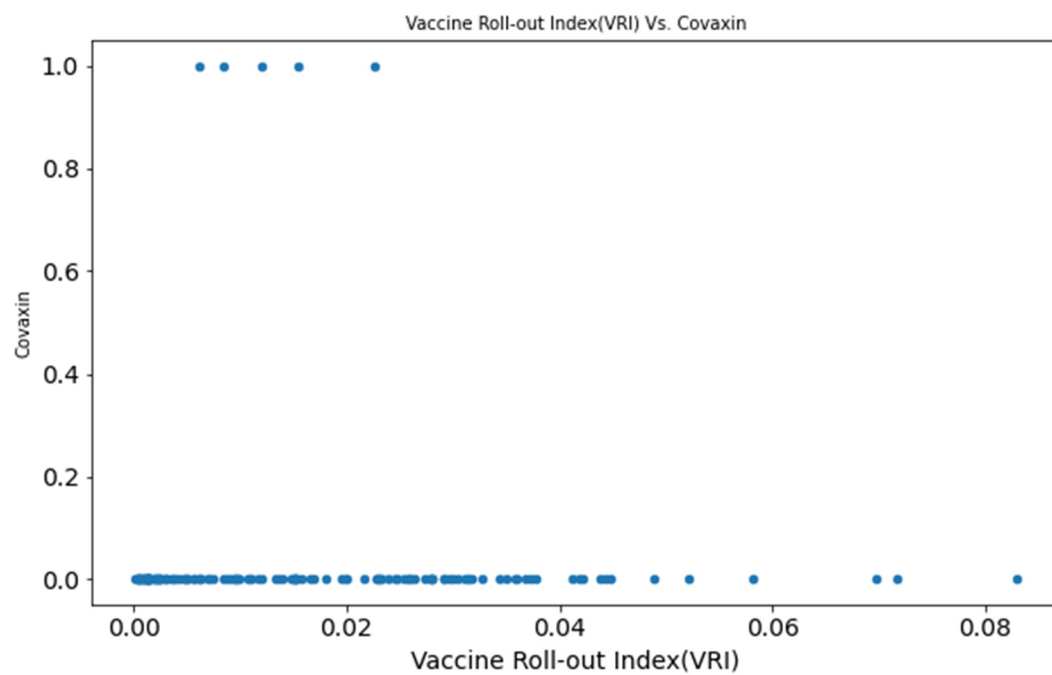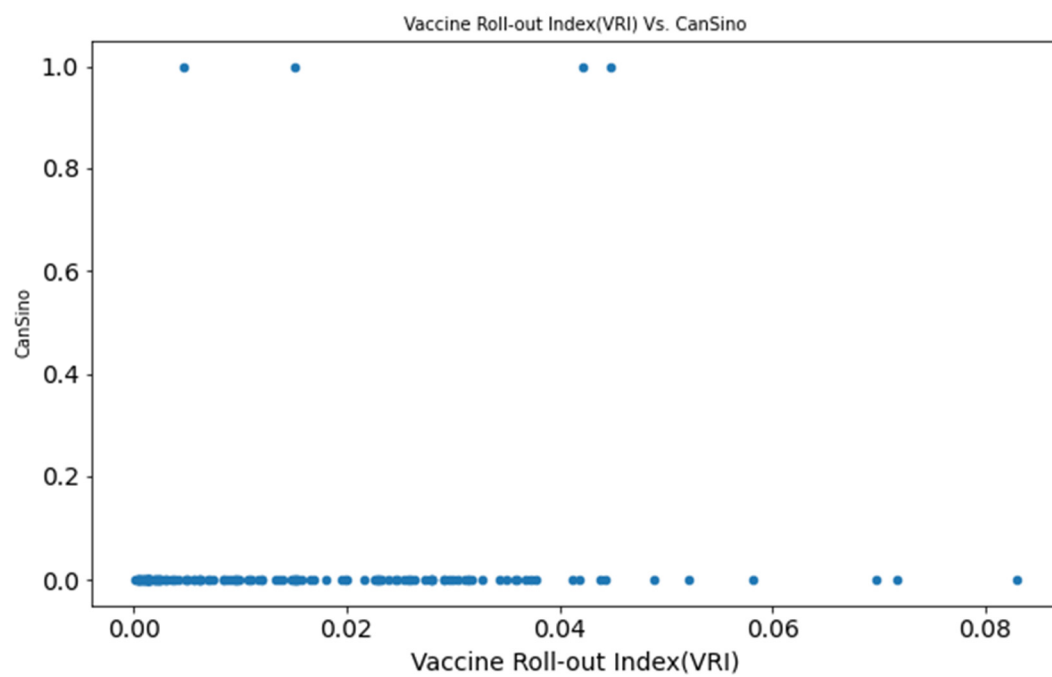

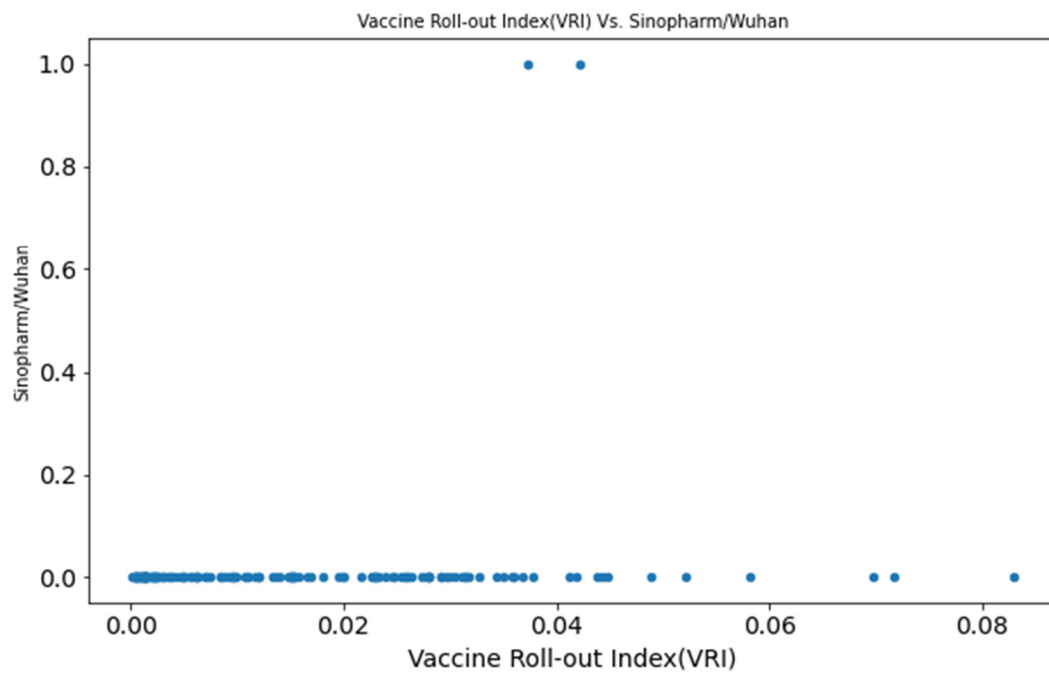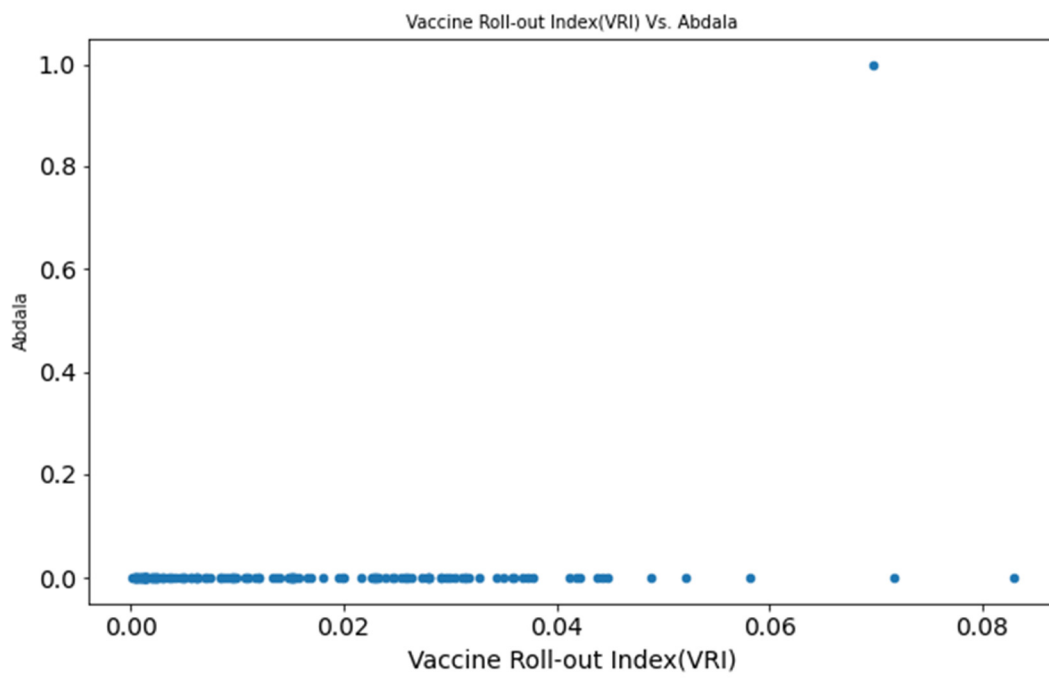

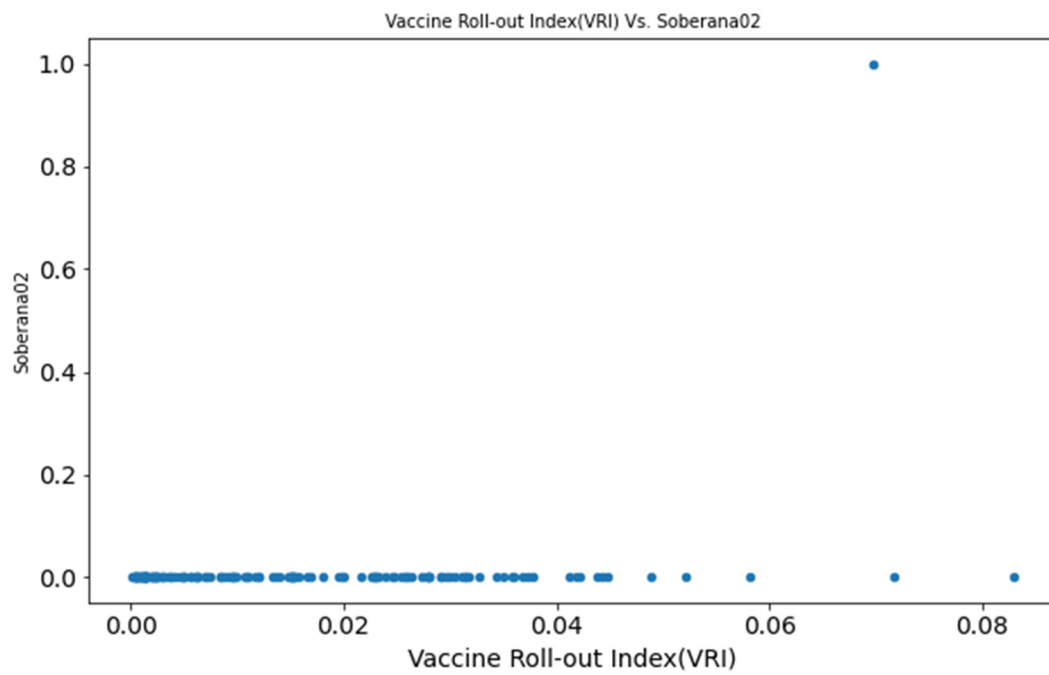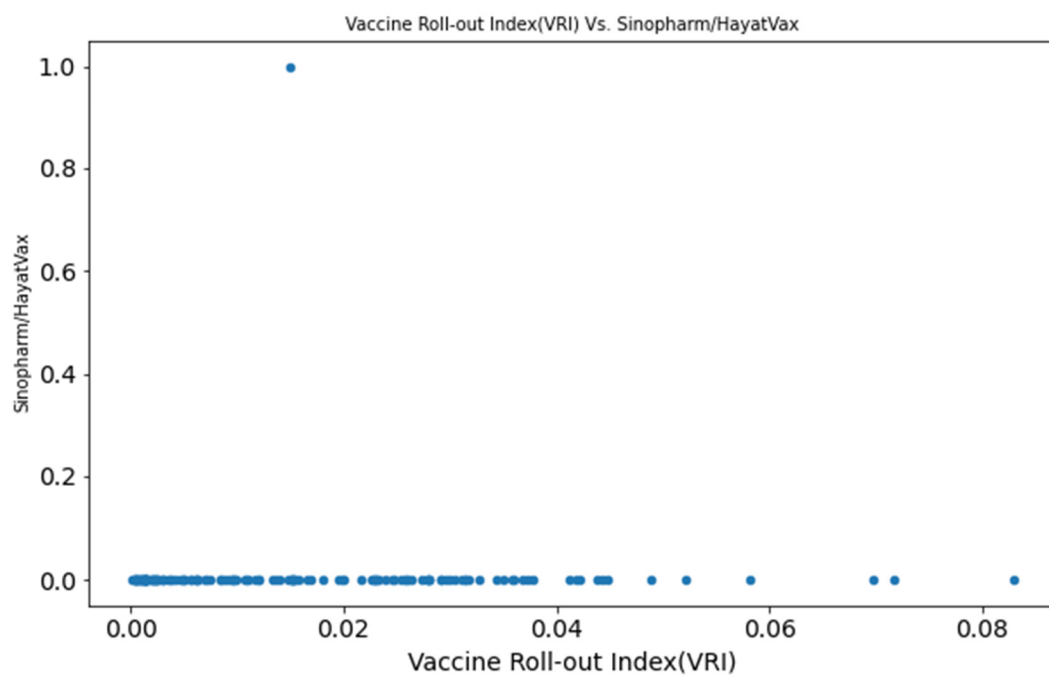

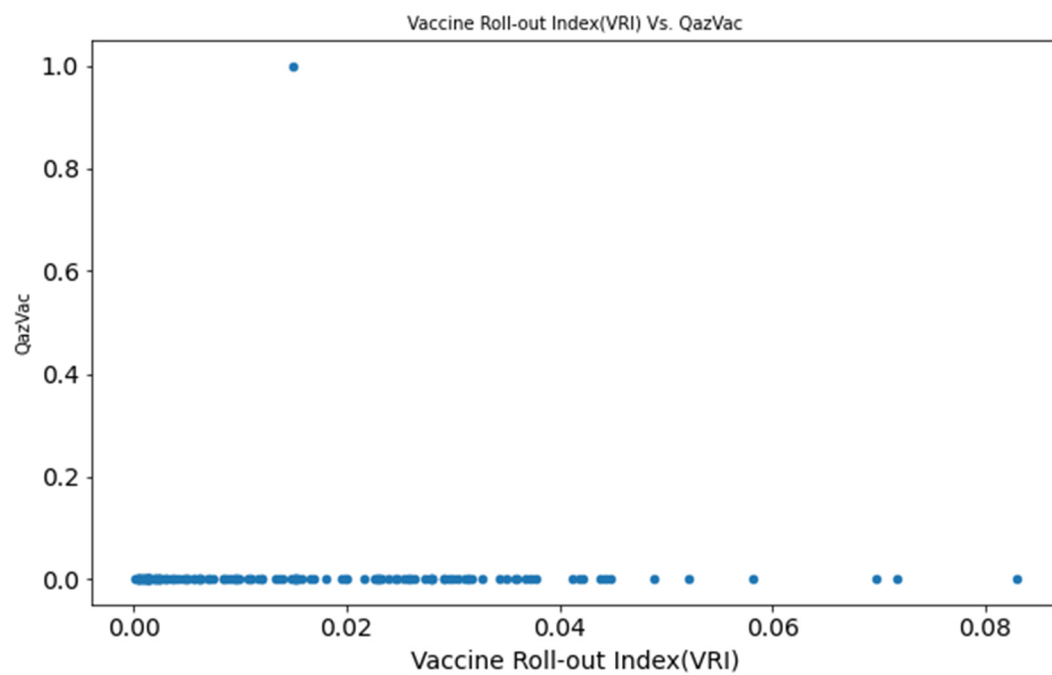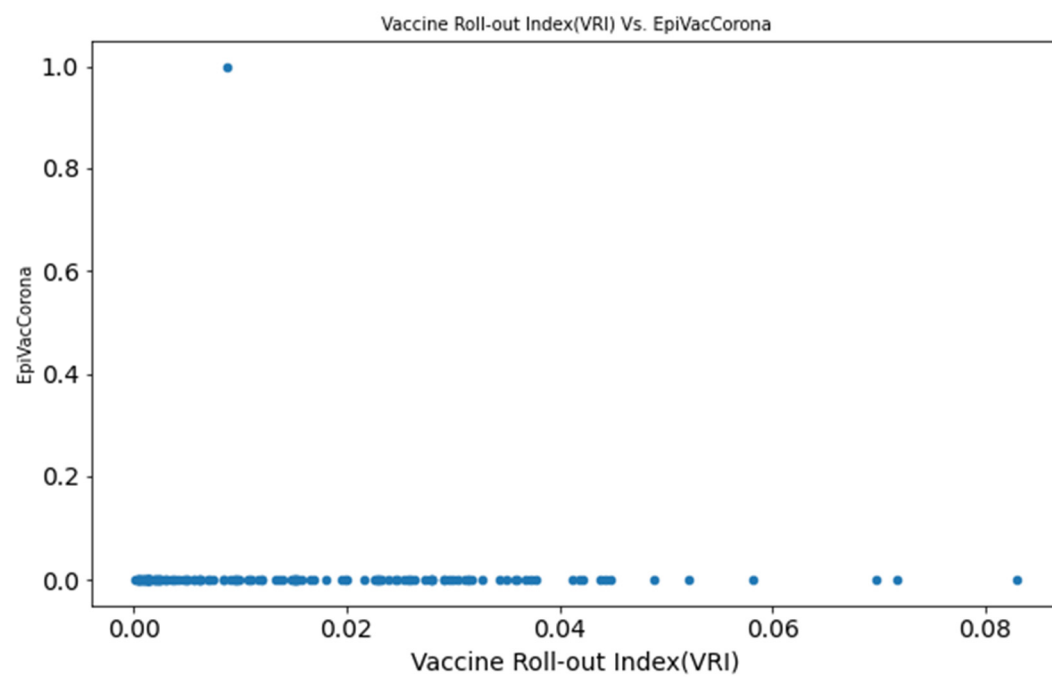

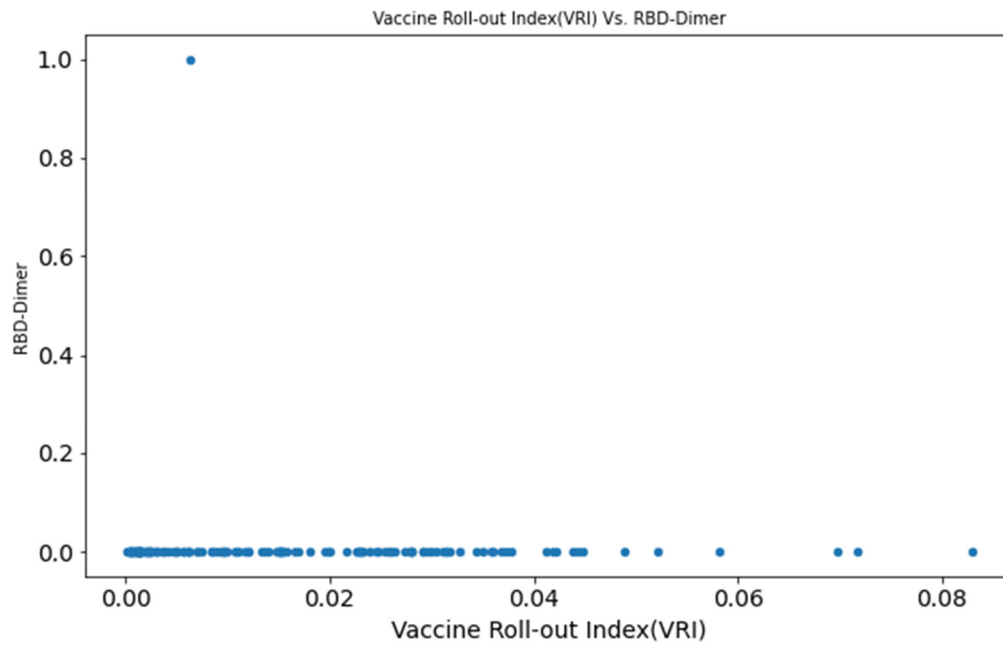

**Table S1.** Estimated vaccination uptake rates across studied countries.

| Country     | Vaccination uptake rate(r) |
|-------------|----------------------------|
| Afghanistan | 0.036886                   |
| Albania     | 0.050539                   |
| Algeria     | 0.238886                   |
| Angola      | 0.041562                   |
| Argentina   | 0.024316                   |
| Armenia     | 0.043949                   |
| Australia   | 0.033448                   |
| Austria     | 0.026451                   |
| Azerbaijan  | 0.023641                   |
| Bahamas     | 0.040445                   |
| Bahrain     | 0.02601                    |
| Bangladesh  | 0.04429                    |
| Belarus     | 0.059885                   |
| Belgium     | 0.027123                   |
| Benin       | 0.098466                   |
| Bolivia     | 0.036471                   |
| Botswana    | 0.040315                   |
| Brazil      | 0.026061                   |
| Bulgaria    | 0.031243                   |
| Cameroon    | 0.02808                    |
| Canada      | 0.029401                   |
| Cape Verde  | 0.032556                   |
| Chad        | 0.120965                   |
| Chile       | 0.033766                   |
| China       | 0.037979                   |
| Colombia    | 0.029999                   |
| Comoros     | 0.105911                   |
| Croatia     | 0.03123                    |
| Cuba        | 0.088333                   |

---

|               |          |
|---------------|----------|
| Cyprus        | 0.032356 |
| Czechia       | 0.026624 |
| Denmark       | 0.023935 |
| Djibouti      | 0.07632  |
| Ecuador       | 0.026507 |
| Egypt         | 0.04985  |
| Estonia       | 0.027471 |
| Eswatini      | 0.02077  |
| Ethiopia      | 0.068304 |
| Finland       | 0.026239 |
| France        | 0.027228 |
| Gabon         | 0.036543 |
| Gambia        | 0.040028 |
| Georgia       | 0.045149 |
| Germany       | 0.028984 |
| Ghana         | 0.03259  |
| Greece        | 0.026333 |
| Guatemala     | 0.03564  |
| Guinea        | 0.038233 |
| Guinea-Bissau | 0.098046 |
| Guyana        | 0.050397 |
| Haiti         | 0.39486  |
| Honduras      | 0.040873 |
| Hungary       | 0.041707 |
| Iceland       | 0.030035 |
| India         | 0.025807 |
| Indonesia     | 0.020553 |
| Iran          | 0.050244 |
| Iraq          | 0.03765  |
| Ireland       | 0.022765 |
| Israel        | 0.05577  |
| Italy         | 0.027421 |
| Jamaica       | 0.029102 |
| Japan         | 0.054732 |
| Jordan        | 0.030972 |
| Kazakhstan    | 0.03233  |
| Kenya         | 0.041444 |
| Kuwait        | 0.038796 |
| Kyrgyzstan    | 0.077308 |
| Latvia        | 0.038632 |
| Lebanon       | 0.026569 |
| Lesotho       | 0.043525 |
| Liberia       | 0.049799 |
| Libya         | 0.062362 |
| Lithuania     | 0.02914  |
| Luxembourg    | 0.028399 |
| Madagascar    | 0.172796 |
| Malawi        | 0.056374 |
| Malaysia      | 0.030907 |
| Maldives      | 0.038866 |
| Mali          | 0.050372 |
| Malta         | 0.030672 |

---



---

|                      |          |
|----------------------|----------|
| Mauritania           | 0.083366 |
| Mauritius            | 0.024815 |
| Mexico               | 0.030706 |
| Moldova              | 0.046353 |
| Mongolia             | 0.065861 |
| Montenegro           | 0.056839 |
| Morocco              | 0.021285 |
| Mozambique           | 0.035554 |
| Myanmar              | 0.037374 |
| Namibia              | 0.053373 |
| Nepal                | 0.02227  |
| Netherlands          | 0.026902 |
| Nicaragua            | 0.030295 |
| Niger                | 0.047662 |
| Nigeria              | 0.028309 |
| North Macedonia      | 0.048717 |
| Norway               | 0.023933 |
| Oman                 | 0.025975 |
| Pakistan             | 0.038974 |
| Panama               | 0.026058 |
| Paraguay             | 0.040498 |
| Peru                 | 0.028688 |
| Philippines          | 0.035085 |
| Poland               | 0.027506 |
| Portugal             | 0.024118 |
| Qatar                | 0.034198 |
| Romania              | 0.032268 |
| Russia               | 0.021375 |
| Rwanda               | 0.027229 |
| Saudi Arabia         | 0.0306   |
| Senegal              | 0.025564 |
| Serbia               | 0.029498 |
| Seychelles           | 0.040501 |
| Singapore            | 0.027547 |
| Slovakia             | 0.025418 |
| Slovenia             | 0.027816 |
| Somalia              | 0.091266 |
| South Sudan          | 0.066069 |
| Spain                | 0.025311 |
| Sudan                | 0.070128 |
| Suriname             | 0.035867 |
| Sweden               | 0.025062 |
| Switzerland          | 0.027085 |
| Syria                | 0.085745 |
| Tajikistan           | 0.162215 |
| Thailand             | 0.043262 |
| Togo                 | 0.041384 |
| Tunisia              | 0.04269  |
| Turkey               | 0.014432 |
| Uganda               | 0.038506 |
| Ukraine              | 0.025742 |
| United Arab Emirates | 0.02213  |

---

|                |          |
|----------------|----------|
| United Kingdom | 0.025509 |
| Uruguay        | 0.035843 |
| USA            | 0.035458 |
| Uzbekistan     | 0.0365   |
| Venezuela      | 0.049466 |
| Vietnam        | 0.046402 |
| Yemen          | 0.109131 |
| Zambia         | 0.083315 |
| Zimbabwe       | 0.041847 |

**Table S2.** Vaccine Roll-Out Index (VRI) values for the countries studied in the present investigation.

| Country        | Vaccine Roll-out Index(VRI) |
|----------------|-----------------------------|
| Afghanistan    | 0.001210084                 |
| Albania        | 0.019998731                 |
| Algeria        | 0.000376271                 |
| Angola         | 0.002013889                 |
| Argentina      | 0.016492992                 |
| Armenia        | 0.002262223                 |
| Australia      | 0.015207455                 |
| Austria        | 0.028058527                 |
| Azerbaijan     | 0.010991486                 |
| Bahamas        | 0.010610271                 |
| Bahrain        | 0.034968284                 |
| Bangladesh     | 0.002936957                 |
| Belarus        | 0.013910751                 |
| Belgium        | 0.032756669                 |
| Benin          | 0.000470157                 |
| Bolivia        | 0.009740326                 |
| Botswana       | 0.005681481                 |
| Brazil         | 0.01690497                  |
| Bulgaria       | 0.009000794                 |
| Cameroon       | 0.000351055                 |
| Canada         | 0.037804863                 |
| Cape Verde     | 0.009336396                 |
| Chad           | 0.000212166                 |
| Chile          | 0.044754816                 |
| China          | 0.042251672                 |
| Colombia       | 0.015117204                 |
| Comoros        | 0.015341107                 |
| Croatia        | 0.023062005                 |
| Cuba           | 0.069760121                 |
| Cyprus         | 0.036013351                 |
| Czech Republic | 0.025339535                 |
| Denmark        | 0.029578202                 |
| Djibouti       | 0.002069905                 |
| Ecuador        | 0.015100925                 |
| Egypt          | 0.002600051                 |
| Estonia        | 0.023204433                 |
| Eswatini       | 0.001175613                 |
| Ethiopia       | 0.0013058                   |
| Finland        | 0.025772769                 |

---

|               |             |
|---------------|-------------|
| France        | 0.029070493 |
| Gabon         | 0.001431377 |
| Gambia        | 0.000721449 |
| Georgia       | 0.004898321 |
| Germany       | 0.031479699 |
| Ghana         | 0.001333465 |
| Greece        | 0.026033766 |
| Guatemala     | 0.003734472 |
| Guinea        | 0.002328672 |
| Guinea-Bissau | 0.001256714 |
| Guyana        | 0.024537109 |
| Haiti         | 0.000141218 |
| Honduras      | 0.007040066 |
| Hungary       | 0.043844583 |
| Iceland       | 0.041227471 |
| India         | 0.008428507 |
| Indonesia     | 0.004872036 |
| Iran          | 0.00608283  |
| Iraq          | 0.00101829  |
| Ireland       | 0.026399925 |
| Israel        | 0.07166115  |
| Italy         | 0.030387715 |
| Jamaica       | 0.002957235 |
| Japan         | 0.035741875 |
| Jordan        | 0.015264555 |
| Kazakhstan    | 0.014923595 |
| Kenya         | 0.001297087 |
| Kuwait        | 0.02157986  |
| Kyrgyzstan    | 0.006139407 |
| Latvia        | 0.027341645 |
| Lebanon       | 0.007399561 |
| Lesotho       | 0.001482114 |
| Liberia       | 0.000939556 |
| Libya         | 0.004962114 |
| Lithuania     | 0.027962536 |
| Luxembourg    | 0.031362136 |
| Madagascar    | 0.001229315 |
| Malawi        | 0.001321412 |
| Malaysia      | 0.018091996 |
| Maldives      | 0.041921256 |
| Mali          | 0.000489675 |
| Malta         | 0.052144116 |
| Mauritania    | 0.003444146 |
| Mauritius     | 0.022565533 |
| Mexico        | 0.015078367 |
| Moldova       | 0.011592435 |
| Mongolia      | 0.082917821 |
| Montenegro    | 0.029209376 |
| Morocco       | 0.013255739 |
| Mozambique    | 0.000786079 |
| Myanmar       | 0.002404144 |
| Namibia       | 0.004215661 |

---

---

|                      |             |
|----------------------|-------------|
| Nepal                | 0.003857821 |
| Netherlands          | 0.03101026  |
| Nicaragua            | 0.001900779 |
| Niger                | 0.000833531 |
| Nigeria              | 0.000540932 |
| North Macedonia      | 0.019813797 |
| Norway               | 0.02288207  |
| Oman                 | 0.009600429 |
| Pakistan             | 0.00463121  |
| Panama               | 0.013600718 |
| Paraguay             | 0.012059904 |
| Peru                 | 0.010894898 |
| Philippines          | 0.005607966 |
| Poland               | 0.024780549 |
| Portugal             | 0.028033677 |
| Qatar                | 0.044285025 |
| Romania              | 0.015680686 |
| Russia               | 0.008674269 |
| Rwanda               | 0.001359975 |
| Saudi Arabia         | 0.022741332 |
| Senegal              | 0.001384097 |
| Serbia               | 0.023865134 |
| Seychelles           | 0.058249532 |
| Singapore            | 0.034397829 |
| Slovakia             | 0.019527491 |
| Slovenia             | 0.022855304 |
| Somalia              | 0.001434406 |
| South Sudan          | 0.000336367 |
| Spain                | 0.029874942 |
| Sudan                | 0.001296326 |
| Suriname             | 0.014761417 |
| Sweden               | 0.025806435 |
| Switzerland          | 0.027777368 |
| Syria                | 0.000642921 |
| Tajikistan           | 0.008368996 |
| Thailand             | 0.009892484 |
| Togo                 | 0.002270509 |
| Tunisia              | 0.009620598 |
| Turkey               | 0.012053051 |
| Uganda               | 0.000955504 |
| Ukraine              | 0.003075742 |
| United Arab Emirates | 0.03724404  |
| United Kingdom       | 0.031676818 |
| United States        | 0.03678192  |
| Uruguay              | 0.048938744 |
| Uzbekistan           | 0.006328768 |
| Venezuela            | 0.006958236 |
| Vietnam              | 0.002389816 |
| Yemen                | 0.001139693 |
| Zambia               | 0.001815672 |
| Zimbabwe             | 0.006134218 |

---
